1 **WhiB6 is required for the secretion-dependent regulation of ESX-1 substrates in**  
2 **pathogenic mycobacteria.**

3

4 Abdallah M. Abdallah<sup>1\*</sup>@, E.M. Weerdenburg<sup>2\*</sup>, Qingtian Guan<sup>1</sup>, R. Ummels<sup>2</sup>, S.  
5 Borggreve<sup>2</sup>, S.A. Adroub<sup>1</sup>, Tareq B. Malas<sup>1</sup>, Raaeece Naeem<sup>1</sup>, Huoming Zhang<sup>3</sup>, T.D. Otto<sup>4</sup>,  
6 W. Bitter<sup>2@\*\*</sup> & A. Pain<sup>1@\*\*</sup>

7

8 <sup>1</sup>*Pathogen Genomics Laboratory, BESE Division, King Abdullah University of Science and*  
9 *Technology (KAUST), Thuwal-Jeddah, Kingdom of Saudi Arabia;* <sup>2</sup>*Department of Medical*  
10 *Microbiology and Infection Control, VU University Medical Center, Amsterdam, The*  
11 *Netherlands;* <sup>3</sup>*Bioscience Core Laboratory, King Abdullah University of Science and*  
12 *Technology (KAUST), Thuwal-Jeddah, Kingdom of Saudi Arabia;* <sup>4</sup>*Pathogen Genomics, The*  
13 *Wellcome Trust Sanger Institute, Hinxton, Cambridge, United Kingdom*

14

15 \*Joint authors  
16 @for correspondence  
17 Abdallah M. Abdallah (abdallah.abdallah@kaust.edu.sa)  
18 Wilbert Bitter ([w.bitter@vumc.nl](mailto:w.bitter@vumc.nl))  
19 Arnab Pain (arnab.pain@kaust.edu.sa)

20

21

22 Abstract

23

24 The mycobacterial type VII secretion system ESX-1 is responsible for secretion of a number  
25 of proteins that play an important role during infection of the host. Regulation of expression  
26 of secreted proteins is often essential to establish a successful infection. Using transcriptome  
27 sequencing, we found that abrogation of ESX-1 function in *Mycobacterium marinum* leads to  
28 a pronounced increase in gene expression levels of the *espA* operon during infection of  
29 macrophages, suggesting an important role in ESX-1-mediated virulence during the early  
30 phase of infection. In addition, we found that disruption of ESX-1-mediated protein secretion  
31 leads to a specific down-regulation of the substrates, but not the structural components of this  
32 system, in both *M. marinum* and *M. tuberculosis* during growth in culture medium. We  
33 established that down-regulation of ESX-1 substrates is the result of a regulatory process,  
34 which is influenced by the putative transcriptional regulator *whib6*, located adjacent to the  
35 *esx-1* locus. In addition, overexpression of the ESX-1 associated PE35/PPE68 protein pair  
36 resulted in significantly increased secretion of the ESX-1 substrate EsxA, demonstrating a  
37 functional link between these proteins. Together, these data show that ESX-1 substrates are  
38 regulated independently from the structural components, both during infection and as a result  
39 of active secretion.

40

## 41 Introduction

42

43 Mycobacteria use several different type VII secretion systems (T7S) to transport proteins  
44 across their thick and waxy cell envelope. One of these T7S systems, ESX-1, is responsible  
45 for the transport of a number of important virulence factors. Disruption of the *esx-1* gene  
46 cluster severely reduces virulence of *M. tuberculosis* (1), whereas restoration of *esx-1* in the  
47 *Mycobacterium bovis*-derived vaccine strain BCG, which has lost part of the *esx-1* region as a  
48 result of continuous passaging, leads to an increase in virulence (2). Many studies have tried  
49 to elucidate the function of ESX-1 substrates in virulence. In pathogenic mycobacteria, such  
50 as *Mycobacterium tuberculosis* and the fish pathogen *Mycobacterium marinum*, ESX-1 is  
51 responsible for the translocation of these bacteria from the phagolysosomal compartment to  
52 the cytosol of macrophages (3, 4). This translocation activity has been attributed to the  
53 membrane-lysing capacity of the secreted protein EsxA (also called ESAT-6) (5, 6).  
54 Interestingly, a close homologue of this protein is also secreted by non-pathogenic and non-  
55 translocating mycobacteria such as *Mycobacterium smegmatis*. A recent report indicated that,  
56 although EsxA of *M. smegmatis* and *M. tuberculosis* are highly homologous, their membrane-  
57 lysing potential is different (7). In *M. smegmatis*, ESX-1 is involved in a completely different  
58 process, *i.e.* conjugative DNA transfer (8). The proposed functions of ESX-1 in pathogenic  
59 mycobacterial species include host cell entry and intercellular spread (9).

60 The ESX-1 substrates identified so far are mostly encoded by genes of the *esx-1* locus,  
61 such as EsxA, EsxB, EspE and EspB. The exceptions are EspA and EspC (10, 11) that are  
62 both part of the *espA* operon, which is located elsewhere in the genome. However, these genes  
63 are homologous to genes of the *esx-1* locus, *i.e.* *espE* and *espF*, respectively. A peculiar  
64 characteristic of ESX-1 substrates is that they are mutually dependent, meaning that their  
65 secretion is dependent on secretion of the other substrates (10). The secreted ESX proteins

66 contain a conserved WxG amino acid motif located between two  $\alpha$ -helices (12). Recently,  
67 another conserved secretion signal present in all secreted protein pairs was identified. This C-  
68 terminal YxxxD/E motif can target proteins for secretion, but does not determine specificity  
69 to a particular type VII system (13). Therefore, it is still difficult to predict novel ESX-1  
70 substrates.

71 In order to establish a successful infection, mycobacteria need regulatory mechanisms  
72 to express the right proteins at the right time. Different environments require specific  
73 transcriptional responses to successfully deal with the stress conditions encountered. During  
74 the first stages of infection, ESX-1-mediated protein secretion is one of the most important  
75 virulence mechanisms of pathogenic mycobacteria (4, 9, 10, 14, 15). Consequently,  
76 transcriptional regulation of *esx-1* and associated genes needs to be orchestrated tightly. The  
77 transcriptional regulator PhoP of the two-component system PhoPR positively regulates  
78 transcription of many *esx-1* associated genes, including the *espA* operon (16, 17). It has been  
79 proposed that PhoP regulation is dependent on environmental pH (18), which could indicate  
80 that the acidic environment of the phagosome induces *esx-1* gene transcription via PhoP  
81 leading to bacterial escape from this compartment. Other studies have shown that the *espA*  
82 operon is, in addition to PhoP, also regulated by the transcription factors EspR, MprAB and  
83 the repressors CRP and Lsr2, indicating that tight regulation of this operon is essential and,  
84 furthermore, suggesting that the *espA* operon may be regulated separately from the other  
85 ESX-1 substrates (19-22).

86 Since ESX-1 is crucial for virulence, inactivation of this secretion system would be  
87 expected to have a large impact on gene regulation processes in mycobacteria. Here, we apply  
88 RNA-seq and quantitative proteomics to determine gene expression and proteomic profiles of  
89 the pathogenic mycobacteria *M. marinum* and *M. tuberculosis* in absence of a functional  
90 ESX-1 secretion system. During short-term infection of macrophages, we observed highly

91 increased transcript levels of the *espA* operon. In contrast, during *in vitro* growth in culture  
92 medium, transcription of most ESX-1 substrates and some putative new substrates was  
93 decreased. Based on these gene transcription levels, we could confirm a regulatory role for the  
94 putative transcriptional regulator WhiB6 in gene expression of ESX-1 substrates.  
95

## 96 Results

97

### 98 *Global features of the M. marinum esx-1 mutant transcriptome and proteome*

99 In order to investigate the effect of ESX-1 disruption on gene expression and protein  
100 production, RNA and protein were extracted from three independent exponential phase  
101 cultures of *M. marinum* E11 strain and their isogenic *esx-1*-mutant during growth in 7H9  
102 culture medium to characterize the transcriptome and proteome. Using transcriptomics (RNA-  
103 seq) and mass-spectrometry (MS) based proteomics with isobaric labeling for quantification,  
104 we captured the expression dynamics of transcripts and proteomes of the *esx-1* mutant. Data  
105 quality was assessed using Euclidean distance matrices for RNA (Figure S1) and principal  
106 component analysis (PCA) for protein (Figure S2), which demonstrated the degree of  
107 reproducibility between biological replicates. The total transcriptome and proteome data are  
108 recorded as an average of the clustered samples. A total of 823 genes passed our filter as  
109 differentially expressed (DE) as messenger RNA, of which 525 were classified as down-  
110 regulated and 298 as up-regulated (Figure 1A, Table S1). To determine parallel change in the  
111 protein level, 1,657 proteins were identified by the presence of 2 or more peptides, of which  
112 576 proteins passed our filter and classified as differentially expressed. Of these, 412 proteins  
113 were found to be down-regulated and 164 were up-regulated (Table S2) and 482 protein-  
114 coding genes are shared and identified in both RNA-seq and quantitative proteomics datasets  
115 (Figure 1C).

116

117 The degree of global correlation between gene expression and protein abundance scores  
118 among the shared gene was relatively low (Figure S3A), which have been noted in other  
119 bacterial studies (23). However, within certain class of *M. marinum* functional categories  
120 (<http://mycobrowser.epfl.ch/marinolist.html>), the degree of correlation was much higher, with

121  $R^2$  exceeding 0.8 for lipid metabolism (Figure 1D), regulatory (Figure 1E) and conserved  
122 hypotheticals categories (Figure S3F). 28% of genes exhibiting differential expression at the  
123 RNA and protein level fell into Intermediary metabolism and respiration category, 18% for  
124 cell wall and cell process category, 15% for information pathways and 14% for lipid  
125 metabolism (Figure S4).

126 Transitional profiling analysis of the double auxotrophic *M. tuberculosis* mc<sup>2</sup>6020 mutant  
127 strains and their isogenic *esx-1* mutants during growth was carried out to identify genes whose  
128 expression was dependent on the ESX-1 disruption (Figure 1B, Table S3).

129

130 ***Major effects of ESX1 mutation on genes encoding ESX-1 substrates and biosynthetic***  
131 ***pathways***

132 Analysis of differential expression (DE) identified changes in genes involved in a variety of  
133 cellular processes (Figure 2), although the majority of these top differentially regulated genes  
134 were associated with cell wall and cell processes and lipid metabolism functional categories.

135 We noted that a substantial number of *esx-1*-associated genes were down-regulated in the  
136 mutant strains during growth in culture medium including 11 genes were located within or  
137 directly adjacent to the *esx-1* gene cluster (Figure 2, 3A). Among these down-regulated genes  
138 were those coding for known ESX-1 substrates, such as EsxA, EsxB, EspE and EspB.

139 Remarkably, mRNA levels of core components of the ESX-1 secretion system, *i.e.* encoding  
140 members of the type VII secretion complex such as EccB<sub>1</sub>, EccD<sub>1</sub>, EccE<sub>1</sub> and MycP<sub>1</sub>,  
141 remained unchanged, even though their respective genes are interspersed with genes encoding  
142 the ESX-1 substrates. In contrast to mRNA level, we noted strong increase of EsxA and EsxB  
143 at the protein level, probably reflecting the accumulation of these proteins in the cell due to  
144 the secretion defect (Figure 1F, 2). Our data also indicate a significant effect of *esx-1*  
145 disruption on genes associated with lipid metabolism, including synthesis of mycolic acids

146 (Figure 2). Strong down-regulation was observed at mRNA and protein levels for several  
147 polyketide synthases including genes involved in phthiocerol dimycocerosate synthesis and  
148 mycolic acid biosynthesis such as, *umaA*, *mmaA3*, *accD5*, *accD6*, and *pks15/1*, which are  
149 components of lipid biosynthesis (Figure 2, Table S1, S2). The change in *esx-1* and lipid  
150 metabolism-associated genes at mRNA and protein levels that we observed was not  
151 completely unexpected, since it has been reported previously that ESX-1-dependent protein  
152 secretion and mycolic acid synthesis are critically linked (24). However, we also noted a  
153 surprisingly broad impact of ESX-1 mutation on major biosynthetic pathways including  
154 ribosomal protein synthesis and DNA biosynthesis (Figure 2, table S1, S2). Down-regulation  
155 was observed at mRNA and protein levels for several ribosomal protein genes, DNA gyrase  
156 and a ribonucleotide-diphosphate reductase, which are components of protein and DNA  
157 biosynthesis, respectively. We identified also changes at both mRNA and protein levels in  
158 genes involved in general stress responses (*grpE*, *dnaK*, *groES*, *groEL1*), stress response  
159 regulation (*sigA*, *sigB*, *devS*), members of the WhiB family (*whiB2*, *whiB4*, *whiB6*) and  
160 several PE\_PGRS genes (Figure 2). For *M. tuberculosis*, a similar trend was observed (Figure  
161 2). In fact, of all genes, the *esx-1* genes encoding substrates EsxA, EsxB and EspK were the  
162 most significantly down-regulated in the mutant strain (Figure 2, Table S3). In contrast to *M.*  
163 *marinum* mutant, gene expression levels of *eccB<sub>1</sub>* and *eccD<sub>1</sub>* were also somewhat decreased in  
164 the *M. tuberculosis* mutant (Figure 2) On the other hand, the *esx-1* mutation did not seem to  
165 exert a significant effect on the expression of genes involved in lipid metabolism compared to  
166 *M. marinum* (Figure 2, Table S1, S3). Finally, a significant number of genes that are  
167 associated with information pathways including ribosomal protein genes were up-regulated at  
168 the mRNA level in the *esx-1* mutant (Figure 2). Taken together, the observed changes in the  
169 *esx-1* mutant transcriptome and proteome reflect the role of *esx-1* cluster employed by  
170 mycobacteria for major biosynthetic pathways.



171

172

173

174 ***Global Transcriptional Profiling of intraphagosomal *M. marinum* and the *esx-1* mutant***

175 We next determined the effect of ESX-1 abrogation in *M. marinum* on gene transcription  
176 during infection of primary macrophages. Using PMA-differentiated THP-1 cell line as a  
177 model of primary macrophages, we analyzed the global gene expression of *M. marinum* wild-  
178 type and the *esx-1* mutant after 6 h of infection. Wild-type mycobacteria can escape the  
179 phagosome within a couple of hours after infection, whereas *esx-1* mutants are known to be  
180 limited to the phagosomal compartment. The intraphagosomal transcriptome of *esx-1* mutant  
181 was compared with the intracellular transcriptome of *M. marinum* wild type. Furthermore,  
182 these intracellular transcriptomes were also compared with the transcriptome of *M. marinum*  
183 wild-type grown in standard broth culture. We identified 720 ( $p < 0.05$ ) genes with significant  
184 changes in expression after THP-1 infection in *esx-1* mutant compared to the wild type strain.  
185 Of these, 465 genes were down-regulated and 255 genes were up-regulated (Table S4, Figure  
186 S5). Remarkably, none of the genes within the *esx-1* region were significantly differentially  
187 expressed in the *esx-1*-mutant as compared to the wild-type strain. However, we did find a  
188 specific and pronounced increase in transcript levels of the *espA* operon in the  
189 intraphagosomal transcriptome of *esx-1* mutant as compared with the in vitro transcriptomes  
190 (Figure 3A). During growth in culture medium, mRNA levels of *espA* did not differ between  
191 the wild type and *esx-1*-deficient *M. marinum*, which was confirmed by q-RT-PCR (Figure  
192 3B). Therefore, these data suggest that proteins encoded by the *espA* operon, i.e. EspA, EspC  
193 and EspD, play an important role in ESX-1-specific processes during the first stages of  
194 macrophage infection. The *espA* operon was also somewhat induced in the wild-type bacteria  
195 inside macrophages, albeit at a lower level. Perhaps this difference is due to the fact that wild-

196 type bacteria are able to escape from the phagosome, whereas the *esx-1* mutant population are  
197 not.

198 Further analysis showed that a significant number of genes that code for functions of cell wall  
199 and cell process were differentially regulated by intracellular *M. marinum* wild-type as well  
200 ESX-1-deficient strain (Table S5, S6). *M. marinum* genes involved in mycolic acid synthesis,  
201 phthiocerol dimycocerosate (PDIM) synthesis and transport to the cell surface, such as *fabG1*,  
202 *accDs*, *ppsC*, *ppsD*, *pks11\_1*, *pks13*, as well as genes coding for the polyketide synthases, and  
203 the mycolic acid methyltransferase *umaA*, were differentially expressed during infection of  
204 THP-1 cells (Figure 3C, D). Furthermore, *cpsY* a gene that encodes UDP-glucose-4-  
205 epimerases and essential for linking of peptidoglycan and mycolic acid (25) had a pronounced  
206 increase of its message in the intracellular *esx-1* mutant (Table S4, S5, S6, S7). We also found  
207 many genes, such as *ftsE*, *ftsH*, *ftsW*, *murC*, and *murG* that are associated with cell division  
208 and peptidoglycan assembly (26, 27), were down-regulated by intracellular bacteria (Table  
209 S4, S5, S6, S7).

210 A significant number of genes that code for functions of lipid metabolism and metabolic  
211 adaptation were differentially regulated in macrophages (Figure S6A). This subset includes  
212 genes involved in fatty acid metabolism, such as isocitrate lyase (*icl*), an enzyme necessary  
213 for the glyoxylate cycle and required for intracellular survival (28, 29), *pckA*, which encodes  
214 the phosphoenolpyruvate carboxykinase and essential for mycobacterial survival in both  
215 macrophages and mice (30, 31), energy metabolism (Figure S6B) and KstR-dependent  
216 cholesterol regulon (Figure S6C), which is involved in lipid degradation and carbon  
217 metabolism (32). We also observed a significant effect for a number of genes involved in  
218 general stress responses (*groES*, *groEL1*, *hsp*, *ahp*, *dnaK*), stress response regulation (*sigB*,  
219 *devR*, *devS*, *hspR*, *kstR*), including members of the WhiB family (*whiB2*, *whiB3*, *whiB4*, *whiB*,  
220 *whiB6*, *whiB7*) and alternative sigma factors (*sigE*, *sigL*, *sigM*), during the infection in *esx-1*

221 mutant. This pattern is illustrated in figure S6D and is probably linked with to stressful  
222 intraphagosomal conditions.

223

#### 224 ***Different M. marinum esx-1 transposon mutants have similar gene transcription profiles***

225 The ESX-1-deficient strain of *M. marinum* used for RNA sequencing contains a transposon in  
226 the *eccCb<sub>1</sub>* gene. To confirm that the gene transcription effects we observed were due to a  
227 defective ESX-1 system and not due to a side effect of this particular mutation, we analyzed  
228 several mutants containing transposon insertions in different genes from the *esx-1* gene cluster  
229 and compared mRNA levels of selected genes by quantitative RT-PCR. Our results show  
230 decreased transcript levels of the known ESX-1 substrate *esxA* and other *esx-1* secretion  
231 associated (*esp*) genes *espL*, *espK* and *espJ* for all tested *esx-1* mutants, whereas transcript  
232 levels of *eccD<sub>1</sub>*, which encodes a structural component of the ESX-1 system, did not differ  
233 from wild-type *M. marinum* (Figure 4). These gene expression patterns in the *eccB<sub>1</sub>*, *eccCa<sub>1</sub>*,  
234 *eccD<sub>1</sub>* and *eccE<sub>1</sub>* transposon mutants are similar to the RNA sequencing results obtained for  
235 the *eccCb<sub>1</sub>* mutant. The only exception was that for the mutant containing a transposon  
236 insertion in *eccD<sub>1</sub>*, we observed an increase of *eccD<sub>1</sub>* transcription itself and to a lesser extent  
237 of the adjacent gene *espJ* (Figure 4). However, this increase is most likely due to the presence  
238 of a strong promoter on the transposon that transcribes the kanamycin resistance cassette, as  
239 the measured mRNA is transcribed from sequences directly downstream of this promoter.  
240 Altogether, our results demonstrate that inactivation of the ESX-1 secretion system leads to a  
241 down-regulation in transcription of ESX-1 substrates and associated proteins.

242

#### 243 ***ESX-1 substrate gene transcription is reduced by a regulatory mechanism***

244 We next sought to determine the molecular mechanism underlying down-regulation of  
245 specific transcripts in *esx-1* mutant strains of *M. marinum*. It is possible that the decrease in

246 mRNA levels is due to a regulatory effect at the level of transcription. Alternatively, mRNA  
247 derived from specific sequences may be degraded via a post-transcriptional mechanism. To  
248 investigate these possibilities, we expressed an extra copy of the *espL* gene under control of a  
249 constitutively active promoter in the *M. marinum* wild type and *eccCb<sub>1</sub>* mutant strains and  
250 determined *espL* gene transcript levels. We found a similar increase in *espL* transcripts in both  
251 wild type and *eccCb<sub>1</sub>* mutant strains, indicating that degradation of specific mRNA is  
252 probably not the cause of the decreased mRNA levels in the mutant strain (Figure 5A).  
253 Expression levels of the downstream gene *espK* were not affected by the introduction of *espL*.  
254 These results indicate that there is a regulatory mechanism that prevents transcription of genes  
255 encoding ESX-1 substrates and associated proteins in absence of a functionally active ESX-1.  
256

#### 257 ***PE35 and PPE68 play an important role in ESX-1 secretion but not in gene regulation***

258 Previously, PE35, which is located within the *esx-1* gene cluster, has been implicated in the  
259 regulation of *esxA/esxB* gene expression in *M. tuberculosis* (33). In contrast to this proposed  
260 function, the PE35/PPE68\_1 protein pair in *M. marinum*, which coding genes have been  
261 duplicated from the *esx-1* cluster, is secreted via ESX-1 (34, 35). To determine whether PE35  
262 plays a role in regulation of ESX-1 substrates, we overexpressed the *pe35/ppe68\_1* operon in  
263 *M. marinum*. Interestingly, although there was no effect on gene transcription (Figure 5C), we  
264 did notice a substantial increase of EsxA secretion in the wild-type strain (Figure 5B). This  
265 increased EsxA secretion does not seem to represent a general increase in ESX-1 secretion, as  
266 protein levels of the cell surface localized EspE remained similar (Figure 5B). To study this  
267 effect in more detail, we introduced PE35 with a truncated version of PPE68\_1 that only  
268 contained the PPE domain and was devoid of the C-terminal part. Although the introduced  
269 PE35 protein was expressed and secreted efficiently by ESX-1 (Figure 5B), levels of secreted  
270 EsxA were not increased, indicating that the C-terminal part of PPE68\_1 plays a role in EsxA

271 secretion. To determine if secretion of the PE35/PPE68\_1 protein pair itself was important for  
272 this process, we also determined the effect of removing the last 15 amino acids of the PE  
273 protein, containing the general secretion signal. This small deletion not only abolished  
274 secretion of the introduced PE35 protein, it also abolished EsxA secretion completely, despite  
275 the presence of an intact chromosomal copy of the *pe35/ppe68\_1* operon (Figure 5B). This  
276 suggests that the truncated form of PE35 somehow interferes with EsxA secretion. Together  
277 these data show that, although PE35 and PPE68\_1 do not seem to regulate the transcription of  
278 genes encoding ESX-1 substrates, they have a strong effect on EsxA, as was also observed  
279 previously (33).

280

### 281 ***Increasing EspI and EspG<sub>1</sub> does not lead to altered *esx-1* gene expression***

282 A second candidate protein that might regulate gene expression levels of ESX-1 substrates is  
283 EspI. The gene encoding this *esx-1* secretion associated protein of unknown function is  
284 located within the *esx-1* region and is down-regulated in *esx-1* mutants of both *M. marinum*  
285 and *M. tuberculosis* (Figure 2). In contrast to the other Esp proteins, EspI contains a putative  
286 nucleotide-binding domain. However, when we overexpressed this protein, we did not  
287 observe a change in down-regulation of *esx-1* associated gene transcription in the *M. marinum*  
288 *eccCb<sub>1</sub>* transposon mutant, suggesting that EspI does not regulate this process (Figure 5C).  
289 We next focused on EspG<sub>1</sub> as a candidate *esx-1* gene regulator. EspG<sub>1</sub>, which is a cytosolic  
290 protein that is not part of the membrane-bound secretion machinery, has recently been shown  
291 to interact specifically with PE35/PPE68\_1 in *M. marinum* (34). It is conceivable that EspG<sub>1</sub>  
292 might function as a sensor that measures protein levels of intracellular ESX-1 substrates.  
293 When substrate levels are low, unbound EspG<sub>1</sub> may signal to induce gene expression. In  
294 absence of a functional ESX-1 system, accumulated PE35/PPE68\_1 or other substrates may  
295 occupy EspG<sub>1</sub> leading to reduced transcription of *esx-1* associated genes. In order to

296 investigate the effect of EspG<sub>1</sub> on *esx-1* associated gene expression and protein levels, we  
297 increased EspG<sub>1</sub> levels by overexpressing the *espG<sub>1</sub>* gene in wild-type and ESX-1-deficient  
298 *M. marinum*. However, this did not result in altered gene transcription (Figure 5C), nor ESX-1  
299 protein secretion (data not shown). Together, our data shows that EspI and EspG<sub>1</sub> do not  
300 appear to play a key role in *esx-1* associated gene regulation.

301

### 302 ***WhiB6 plays a role in transcription of ESX-1 substrates***

303 In addition to *espI*, also another gene encoding a putative regulatory protein was down-  
304 regulated in *esx-1* mutant strains of both *M. marinum* and *M. tuberculosis*, *i.e.* *whiB6* (Figure  
305 2). WhiB proteins are actinobacteria-specific regulators that contain iron-sulfur clusters and  
306 are thought to act as redox-sensing transcription factors that can result in both gene activation  
307 and repression (36). WhiB6 has been suggested to be involved in the regulation of EsxA  
308 secretion (37), and later studies have confirmed this suggestion (38-40). In order to determine  
309 whether WhiB6 had an effect on expression levels of *esx-1* associated genes, we  
310 overexpressed this protein in the ESX-1-deficient *M. marinum eccCb<sub>1</sub>* transposon mutant  
311 strain. We found that specifically those genes that were already down-regulated in the mutant  
312 strain, such as *esxA* and *espK*, showed an even further transcriptional inhibition when *whib6*  
313 levels were increased (Figure 5D). Furthermore, expression of *eccD1* was unaltered by *whib6*  
314 overexpression, indicating that *whib6* is involved in transcription of ESX-1 substrates and  
315 associated genes, but not of the system components. Surprisingly, *whiB6* is one of the genes  
316 that is down-regulated upon abrogation of ESX-1-mediated protein secretion. Possibly,  
317 WhiB6 is activated when the ESX-1 machinery is blocked and represses genes encoding  
318 ESX-1 substrates as well as its own gene. Together, our data suggests that ESX-1 regulation is  
319 even more complex than previously thought.

320

### 321 ***WhiB6 Is Required for Regulation of ESX-1 System***

322 To determine whether WhiB6 is required for ESX-1 regulation, we constructed a deletion  
323 mutant of *whiB6* (*M. marinum*  $M^{USA} \Delta whiB6$  and *M. marinum*  $M^{VU} \Delta whiB6$ ). Analysis of  
324 gene expression identified 32 genes ( $p < 0.05$ ) exclude the *esx-1* locus genes showed a clear  
325 pattern that is significantly downregulated after *whiB6* gene has been knocked out (Figure  
326 6A). Complementation of *M. marinum*  $M^{USA} \Delta whiB6$  and *M. marinum*  $M^{VU} \Delta whiB6$  with  
327 the *whiB6* gene on a mycobacterial shuttle plasmid reversed the downregulation of these  
328 genes to high expression level (Figure 6A, B). As expected, several genes that are associated  
329 with oxidative stress (*ahpC*, *ahpD*, *rebU*) were found in the DE gene pool. Also, the  
330 enrichment analysis of the associated Gene Ontology terms for the DE genes (*dnaB*, *dinP*)  
331 reveal that *whiB6* may also regulate DNA replication or repair through regulating DNA-  
332 directed DNA polymerase and DNA helicase (Figure S7). However, many of the DE genes  
333 are hypothetical proteins and needed to be further characterized. Interestingly, *whiB7* is within  
334 the *whiB6*-active gene set, which implies that WhiB7 is active by, or works with WhiB6.  
335 Other than the *whiB6*-active gene set, 13 genes, which are involved in iron-sulfur cluster  
336 binding, cellular lipid metabolic processes are downregulated.

337 Remarkably, most of the genes within ESX-1 locus show an apparent co-expression with  
338 WhiB6 protein when *whiB6* has been knocked out (Figure 6C). These genes show a clear  
339 down-regulation while the expression was recovered when *whiB6* has been complemented in  
340 both strains (Figure 6C). The substrates of ESX-1 including EsxA, EsxB, EspE and EspF are  
341 highly regulated by WhiB6 which corroborates our previous result (Figure 6C).

342

343

### 344 **Discussion**

345

346 In this study, we have determined the transcriptome of the *M. marinum* E11 wild type and the  
347 double auxotrophic *M. tuberculosis* mc<sup>2</sup>6020 mutant strains and compared them with their  
348 isogenic *esx-1* mutants. We found that during growth in 7H9 culture medium, genes encoding  
349 ESX-1 substrates such as EsxA and other ESX-1-associated proteins were down regulated in  
350 the mutant strains, whereas transcription of genes encoding structural components of the  
351 ESX-1 system remained unaffected. This specific decrease in transcription might function as a  
352 mechanism to avoid toxic accumulation of substrates. Interestingly, similar decrease of  
353 substrate production has been shown for the ESX-5 secretion system, where the PE\_PGRS  
354 substrates do not accumulate intracellularly when secretion is blocked (41, 42). However, for  
355 these PE\_PGRS substrates the regulation was shown to be post-transcriptionally (42),  
356 implying that a different mechanism is involved.

357 The most prominent change in gene expression that was observed upon host cell  
358 infection by the *M. marinum* *esx-1* mutant strain was the increase in transcription of the *espA*  
359 operon. The specific and pronounced transcriptional increase of this operon, and not of any  
360 other *esx-1* associated gene, indicates that transcription of the *espA* operon is regulated  
361 independently of the other substrates during infection. Previously, it has been shown that the  
362 *espA* operon is regulated by different transcription and regulation factors, including EspR,  
363 MprAB and PhoPR (20, 43, 44). Our new finding also suggests that EspA, EspC and EspD  
364 are highly important for the bacteria during the early phase of infection. Since ESX-1 has  
365 been shown to be responsible for mycobacterial escape from the phagosome, which occurs  
366 within the first few hours of infection with *M. marinum* (6), the proteins produced by the *espA*  
367 operon may play an important role in this process. Consequently, the avirulent phenotype of  
368 ESX-1-deficient mycobacteria might be partly attributable to the inability to secrete EspA  
369 and/or EspC early in infection.



370 In order to determine how ESX-1 substrate regulation is mediated, we overexpressed  
371 proteins that may have a regulatory function. Overexpression of the *esx-1* encoded EspI and  
372 EspG<sub>1</sub> did not have an effect on the lowered transcription of ESX-1 substrates in ESX-1-  
373 deficient *M. marinum*. The putative regulatory protein WhiB6 however, did affect  
374 transcription of those genes. While transcript levels of *whib6* itself was decreased in *esx-1*  
375 mutants of *M. marinum* and *M. tuberculosis*, increasing WhiB6 by overexpression resulted in  
376 a further decrease in ESX-1 substrate transcription in ESX-1-deficient *M. marinum*. This  
377 clearly indicates that WhiB6 is involved in ESX-1-associated gene regulation, as was also  
378 suggested previously (40) Indeed, there is accumulating evidence that WhiB proteins function  
379 as transcription factors, which may play a role in survival within the host (reviewed in (45)).  
380 Recently, also other groups have presented evidence to support a role of WhiB6 in regulating  
381 the transcription of *esx-1* genes (38-40).

382 A remarkable finding in this study was that overproduction of PE35/PPE68\_1 resulted  
383 in a large increase in EsxA secretion. Previously, deletion of *M. tuberculosis* PE35 was  
384 already shown to abolish *esxA* transcription and secretion of its gene product (33). Now, we  
385 find that EsxA and PE35 secretion are linked, as an increase in PE35 secretion results in a  
386 concomitant increase in EsxA secretion. The fact that the C-terminus of PPE68\_1 is required  
387 for this effect indicates that this is a specific process, which is supported by the fact that cell-  
388 surface localization of another ESX-1 substrate, EspE, is unaffected by overproduction of  
389 PE35/PPE68\_1. Possibly, the PPE68 proteins serve as a chaperone to escort EsxA outside the  
390 bacterium, or it may be part of the secretion apparatus making secretion of specific substrates  
391 more efficient.

392 During *M. marinum* infection of human macrophages, we found that transcription of  
393 many *pe\_pgrs* and *ppe* family genes were strongly down-regulated when ESX-1 function was  
394 abrogated. As much as 50% of all genes with decreased transcript levels in the *esx-1* mutant

395 strain belongs to one of these gene families (Table S4). It has to be noted that in the wild type  
396 strain transcription of *pe\_pgrs* and *ppe* genes was decreased during infection, in comparison  
397 to growth in 7H9 medium (Table S5). As part of an adaptive response to the macrophage  
398 environment, expression of these cell wall localized proteins may be tuned down in order to  
399 evade immune recognition or to reduce cell permeability (46). The fact that in absence of a  
400 functional ESX-1 secretion system these genes are even further down-regulated, again  
401 suggests that there is a functional link or shared transcriptional pathways between ESX-1 and  
402 (some of the) PE\_PGRS and PPE proteins, which are generally ESX-5 substrates (41).

403

404 Taken together, our results show that transcription of the *espA* locus plays an  
405 important role in ESX-1 mediated processes during the first hours of infection. Furthermore,  
406 we established a functional link between PE35 and EsxA secretion and lastly, we found that  
407 WhiB6 may play a regulatory role in transcription of ESX-1 substrates and associated genes.

408

409

## 410 Materials and Methods

411

### 412 ***Bacterial strains and growth conditions***

413 The *esx-1* mutants of the *M. marinum* E11 wild type strain used in this study contain  
414 transposon insertions in *eccB<sub>1</sub>*, *eccCa<sub>1</sub>*, *eccCb<sub>1</sub>*, *eccD<sub>1</sub>* and *eccE<sub>1</sub>* (47). For *M. tuberculosis*, the  
415 attenuated double deletion strains mc<sup>2</sup>6020 and mc<sup>2</sup>6030 of H37Rv were used, with deletions  
416 of *lysA* and *panCD* or *RDI* and *panCD*, respectively (48, 49). Bacterial strains were grown  
417 shaking at 30°C (*M. marinum*) or 37°C (*M. tuberculosis*) in Middlebrook 7H9 culture  
418 medium, supplemented with 10% ADC (Albumin-Dextrose-Catalase, BD Biosciences) and

419 0.05% Tween-80. Culture medium containing the auxotrophic *M. tuberculosis* deletion strains  
420 was supplemented with 50 µg/ml panthothenic acid and, for mc<sup>2</sup>6020, 100 µg/ml L-lysine.

421

#### 422 ***Infection of human macrophages***

423 THP-1 monocytes were cultured at 37°C and 5% CO<sub>2</sub> in RPMI-1640 with Glutamax-1  
424 (Gibco) supplemented with 10% FBS, 100 µg ml<sup>-1</sup> streptomycin and 100 U ml<sup>-1</sup> penicillin.

425 Cells were seeded at a density of 3 x 10<sup>7</sup> cells per T175 flask and differentiated into  
426 macrophages by 48 hours of incubation with 25 ng/ml PMA (Sigma-Aldrich). 1,8 x 10<sup>8</sup> THP-

427 1 cells were infected with *M. marinum* at an MOI of 20 for 2 hours, after which cells were  
428 washed with PBS to remove extracellular bacteria. After 4 additional hours of infection at

429 33°C, THP-1 cells were lysed with 1% Triton X-100. After a low speed centrifugation step to  
430 remove cellular debris, mycobacteria were pelleted after which RNA was extracted as

431 described in the following section.

432

#### 433 ***Genomic sequence***

434 We sequenced the *M. marinum* E11 strain with the PacBio RSII single-molecule real-time  
435 (SMRT) sequencing technology (50). The raw reads were assembled into two pieces (the core

436 and the plasmid) with HGAP assembler (51) using the default parameters. The sequence was  
437 improved with ICORN2 (52) with three iterations, correcting 20 single base pair errors and 61

438 insertions and deletions. To transfer the annotation from the current reference, we used RATT  
439 (53) with the PacBio parameter. Gene models around gaps were manually improved on the

440 new sequence. The updated genome annotation was resubmitted under the same accession  
441 numbers (HG917972 for *M. marinum* E11 main chromosome genome and HG917973 for *M.*

442 *marinum* E11 plasmid pRAW, complete sequence).

443

444 ***RNA extraction and qRT-PCR***

445 *M. marinum* and *M. tuberculosis* cultures were pelleted and bead-beated in 1 ml Trizol  
446 (Invitrogen) with 0.1 mm Zirconia/Silica beads (Biospec Products). After centrifugation,  
447 supernatants were extracted with chloroform and RNA was precipitated with isopropanol.  
448 RNA pellets were washed with 80% ethanol and dissolved in RNase-free water.  
449 Contaminating DNA was removed by incubation with DNase I (Fermentas). For RT-PCR,  
450 cDNA was generated using a SuperScript VILO cDNA synthesis kit (Invitrogen). An  
451 equivalent of 5 ng of RNA was used in the quantitative PCR reactions. Q-RT-PCR was  
452 performed using SYBR GreenER (Invitrogen) and the LightCycler 480 (Roche). Transcript  
453 levels were normalized to the housekeeping gene *sigA* (54), using  $\Delta\Delta C_t$  analysis. All primer  
454 sequences used for q-RT-PCR are listed in Table S8.

455

456 ***RNA preparation for Illumina Sequencing***

457 Total RNA was extracted with Trizol (Invitrogen) and then purified on RNeasy spin columns  
458 (Qiagen) according to the manufacturer's instructions. The RNA integrity (RNA Integrity  
459 Score  $\geq 6.8$ ) and quantity was determined on the Agilent 2100 Bioanalyzer (Agilent; Palo  
460 Alto, CA, USA). As ribosomal RNA comprises the vast majority of the extracted RNA  
461 population, depletion of these molecules through RiboMinus-based rRNA depletion was used.  
462 For this mRNA enrichment, the Invitrogen's RiboMinus<sup>TM</sup> Prokaryotic kit was used according  
463 to manufacturer's instructions. Briefly, 2  $\mu$ g of total RNA samples was hybridized with  
464 prokaryotic rRNA sequence-specific 5'-biotin labeled oligonucleotide probes to selectively  
465 deplete large rRNA molecules from total RNA. Then, these rRNA-hybridized, biotinylated  
466 probes were removed from the sample with streptavidin-coated magnetic beads. The resulting  
467 RNA sample was concentrated using the RiboMinus<sup>TM</sup> concentrate module according to the  
468 manufacturer's protocol. The final RiboMinus<sup>TM</sup> RNA sample was subjected to thermal

469 mRNA fragmentation using Elute, Prime, and fragment Mix from the Illumina TruSeq™  
470 RNA sample preparation kit v2 (Low-Throughput protocol). The fragmented mRNA samples  
471 were subjected to cDNA synthesis using the Illumina TruSeq™ RNA sample preparation kit  
472 (Low-Throughput protocol) according to manufacturer's protocol. Briefly, cDNA was  
473 synthesized from enriched and fragmented RNA using SuperScript III Reverse Transcriptase  
474 (Invitrogen) and SRA RT primer (Illumina). The cDNA was further converted into double  
475 stranded DNA using the reagents supplied in the kit, and the resulting dsDNA was used for  
476 library preparation. To this end, cDNA fragments were end-repaired and phosphorylated,  
477 followed by adenylation of 3'ends and adapter ligation. Twelve cycles of PCR amplification  
478 were then performed, and the library was finally purified with AMPure beads (Beckman  
479 Coulter) as per the manufacturer's instructions. A small aliquot (1 µl) was analyzed on  
480 Invitrogen Qubit and Agilent Bioanalyzer. The bar-coded cDNA libraries were pooled  
481 together in equal concentrations in one pool before sequencing on Illumina HiSeq2000 using  
482 the TruSeq SR Cluster Generation Kit v3 and TruSeq SBS Kit v3. Data were processed with  
483 the Illumina Pipeline Software v1.82.

484

#### 485 ***RNA-Seq analysis***

486 The Illumina reads were mapped with smalt (default parameter) against the new PacBio  
487 reference. From the read count, obtain with bedtools ((55) parameter multicov) -D to include  
488 duplicates and -q 5 to exclude repetitive mapping reads), we perform a differential expression  
489 analysis with DESeq (56), default parameter.

490

#### 491 ***Plasmid construction***

492 The *E.coli* mycobacterial shuttle vector pSMT3 was used for construction of all plasmids. To  
493 overexpress PE35-PPE68\_1 (MMARE11\_01740- MMARE11\_01750), we used a previously

494 described plasmid (13). For construction of the plasmid containing *espG<sub>I</sub>*, this gene was  
495 amplified from the *M. marinum* E11 genome by PCR using primers containing NheI and  
496 EcoRV restriction sites and a 3' HA-epitope. The resulting PCR product and empty pSMT3  
497 were digested with NheI and EcoRV followed by ligation of *espG<sub>I</sub>* into the vector by T4  
498 ligase (Fermentas). For the construction of the plasmid containing *whib6*, this gene was  
499 amplified from the *M. marinum* E11 genome by PCR using primers containing NheI and  
500 BamHI restriction sites. For the other construct, *espI* was amplified from the *M. marinum* E11  
501 genome by PCR using primers containing NheI and BglIII restriction site. PCR product was  
502 digested with NheI and BamHI. Empty pSMT3 was digested with NheI and BamHI after  
503 which PCR products were ligated in the vector. All plasmids were introduced in the *M.*  
504 *marinum* wild-type E11 and its isogenic *eccCb<sub>I</sub>* mutant strain by electroporation. All primer  
505 sequences are listed in Table S8.

506

### 507 ***Analysis of protein expression and secretion***

508 *M. marinum* cultures were grown to mid-logarithmic phase in 7H9 culture medium  
509 supplemented with 0.2% glycerol and 0.2% dextrose. Bacteria were pelleted, washed in PBS  
510 and incubated in 0.5% Genapol X-080 (Sigma-Aldrich) for 30 minutes to extract cell wall  
511 proteins. Genapol X-080-treated *M. marinum* cells were disrupted by sonication. Secreted  
512 proteins were precipitated from the culture supernatant by 10% trichloroacetic acid (TCA,  
513 Sigma-Aldrich). Proteins were separated by molecular weight on 15% SDS-PAGE gels and  
514 subsequently transferred to nitrocellulose membranes (Amersham Hybond ECL, GE  
515 Healthcare Life Sciences). Immunostaining was performed with mouse monoclonal  
516 antibodies directed against the HA-epitope (HA.11, Covance), EsxA (Hyb76-8), or rabbit  
517 polyclonal sera recognizing EspE (57).

518

519 ***LC-MS analysis***

520 Peptide preparation from *M. marinum* E11 strain and their isogenic *esx-1*-mutant was  
521 performed as previously described (58). Approximately 100 µg protein digests of each sample  
522 were labeled with 4plex iTRAQ reagents (Applied Biosystems). The combined iTRAQ-  
523 labeled samples were fractionated using strong cation exchange chromatography. The eluted  
524 fractions were dried and desalted using a Sep-Pak C-18 SPE cartridge (Waters, Milford, MA,  
525 USA). LC-MS analysis as well as MS data processing was carried out following our  
526 published procedure (59). Briefly, each fraction was analyzed three times using LTQ-Orbitrap  
527 Velos (Thermo Scientific). The MS spectra were recorded in the Orbitrap whereas MS2  
528 spectra were recorded in the c-TRAP for HCD fragmentation and in the LTQ for the CID  
529 fragmentation. Both HCD and CID spectra were extracted separately using Proteome  
530 Discoverer software and processed by in-house script before Mascot search against *M.*  
531 *marinum* E11 strain. The mascot results (.dat file) were processed by Scaffold software for  
532 validation of protein identification and quantitative assessment. For protein identification,  
533 Scaffold local false positive rates (FDR) were controlled below 1% for both protein and  
534 peptide identifications (0.91% and 0.9% for peptide and protein respectively for this dataset).  
535 Protein quantitation was processed using Scaffold Q+ which was based on i-Tracker  
536 algorithm (60). The iTRAQ quantitation using HCD is highly accurate and a greater than 2-  
537 fold change were considered as significantly differential expression in this study.

538

539 **Accession codes.**

540 Sequencing reads have been submitted to the EMBL-EBI European Nucleotide Archive  
541 (ENA) Sequence Read Archive (SRA) under the study accession PRJEB8560.

542

543 **Acknowledgements**

544 We thank Astrid van der Sar and Esther Stoop for providing the *M. marinum* E11 ESX-1  
545 mutants. Work in AP's laboratory is supported by KAUST faculty baseline fund  
546 (BAS/1/1020-01-01). Authors thank members of the Bioscience Core Lab (BCL) in KAUST  
547 for sequencing the RNA-seq libraries on the Illumina Hiseq platform and for running protein  
548 samples for the quantitative proteomics workflow with the LTQ-Orbitrap Velos (Thermo  
549 Scientific).

550

## 551 **References**

552

553

- 554 1. Lewis KN, Liao R, Guinn KM, Hickey MJ, Smith S, Behr MA, et al. Deletion of RD1  
555 from *Mycobacterium tuberculosis* mimics bacille Calmette-Guerin attenuation. *The Journal of*  
556 *infectious diseases*. 2003;187(1):117-23.
- 557 2. Pym AS, Brodin P, Brosch R, Huerre M, Cole ST. Loss of RD1 contributed to the  
558 attenuation of the live tuberculosis vaccines *Mycobacterium bovis* BCG and *Mycobacterium*  
559 *microti*. *Mol Microbiol*. 2002;46(3):709-17.
- 560 3. Stamm LM, Morisaki JH, Gao LY, Jeng RL, McDonald KL, Roth R, et al.  
561 *Mycobacterium marinum* escapes from phagosomes and is propelled by actin-based motility.  
562 *Journal of Experimental Medicine*. 2003;198(9):1361-8.
- 563 4. van der Wel N, Hava D, Houben D, Fluittsma D, van Zon M, Pierson J, et al. *M.*  
564 *tuberculosis* and *M. leprae* translocate from the phagolysosome to the cytosol in myeloid  
565 cells. *Cell*. 2007;129(7):1287-98.
- 566 5. de Jonge MI, Pehau-Arnaudet G, Fretz MM, Romain F, Bottai D, Brodin P, et al.  
567 ESAT-6 from *Mycobacterium tuberculosis* dissociates from its putative chaperone CFP-10  
568 under acidic conditions and exhibits membrane-lysing activity. *Journal of bacteriology*.  
569 2007;189(16):6028-34.
- 570 6. Houben D, Demangel C, van Ingen J, Perez J, Baldeon L, Abdallah AM, et al. ESX-1-  
571 mediated translocation to the cytosol controls virulence of mycobacteria. *Cellular*  
572 *microbiology*. 2012;14(8):1287-98.
- 573 7. De Leon J, Jiang G, Ma Y, Rubin E, Fortune S, Sun J. *Mycobacterium tuberculosis*  
574 ESAT-6 exhibits a unique membrane-interacting activity that is not found in its ortholog from  
575 non-pathogenic *Mycobacterium smegmatis*. *The Journal of biological chemistry*.  
576 2012;287(53):44184-91.
- 577 8. Coros A, Callahan B, Battaglioli E, Derbyshire KM. The specialized secretory  
578 apparatus ESX-1 is essential for DNA transfer in *Mycobacterium smegmatis*. *Mol Microbiol*.  
579 2008;69(4):794-808.
- 580 9. Gao LY, Guo S, McLaughlin B, Morisaki H, Engel JN, Brown EJ. A mycobacterial  
581 virulence gene cluster extending RD1 is required for cytolysis, bacterial spreading and ESAT-  
582 6 secretion. *Mol Microbiol*. 2004;53(6):1677-93.
- 583 10. Fortune SM, Jaeger A, Sarracino DA, Chase MR, Sasseti CM, Sherman DR, et al.  
584 Mutually dependent secretion of proteins required for mycobacterial virulence. *Proceedings of*  
585 *the National Academy of Sciences of the United States of America*. 2005;102(30):10676-81.



- 586 11. MacGurn JA, Raghavan S, Stanley SA, Cox JS. A non-RD1 gene cluster is required  
587 for Snm secretion in *Mycobacterium tuberculosis*. *Mol Microbiol*. 2005;57(6):1653-63.
- 588 12. Pallen MJ. The ESAT-6/WXG100 superfamily -- and a new Gram-positive secretion  
589 system? *Trends Microbiol*. 2002;10(5):209-12.
- 590 13. Daleke MH, Ummels R, Bawono P, Heringa J, Vandenbroucke-Grauls CM, Luirink J,  
591 et al. General secretion signal for the mycobacterial type VII secretion pathway. *Proceedings*  
592 *of the National Academy of Sciences of the United States of America*. 2012;109(28):11342-7.
- 593 14. McLaughlin B, Chon JS, MacGurn JA, Carlsson F, Cheng TL, Cox JS, et al. A  
594 mycobacterium ESX-1-secreted virulence factor with unique requirements for export. *Plos*  
595 *Pathog*. 2007;3(8):e105.
- 596 15. Tan T, Lee WL, Alexander DC, Grinstein S, Liu J. The ESAT-6/CFP-10 secretion  
597 system of *Mycobacterium marinum* modulates phagosome maturation. *Cellular microbiology*.  
598 2006;8(9):1417-29.
- 599 16. Asensio JA, Arbues A, Perez E, Gicquel B, Martin C. Live tuberculosis vaccines  
600 based on *phoP* mutants: a step towards clinical trials. *Expert opinion on biological therapy*.  
601 2008;8(2):201-11.
- 602 17. Walters SB, Dubnau E, Kolesnikova I, Laval F, Daffe M, Smith I. The  
603 *Mycobacterium tuberculosis* PhoPR two-component system regulates genes essential for  
604 virulence and complex lipid biosynthesis. *Mol Microbiol*. 2006;60(2):312-30.
- 605 18. Abramovitch RB, Rohde KH, Hsu FF, Russell DG. *aprABC*: a *Mycobacterium*  
606 *tuberculosis* complex-specific locus that modulates pH-driven adaptation to the macrophage  
607 phagosome. *Mol Microbiol*. 2011;80(3):678-94.
- 608 19. Gordon BRG, Li YF, Wang LR, Sintsova A, van Bakel H, Tian SH, et al. *Lsr2* is a  
609 nucleoid-associated protein that targets AT-rich sequences and virulence genes in  
610 *Mycobacterium tuberculosis* (vol 107, pg 5154, 2010). *Proceedings of the National Academy*  
611 *of Sciences of the United States of America*. 2010;107(43):18741-.
- 612 20. Pang XH, Samten B, Cao GX, Wang XS, Tvinnereim AR, Chen XL, et al. *MprAB*  
613 *Regulates the espA Operon in Mycobacterium tuberculosis and Modulates ESX-1 Function*  
614 *and Host Cytokine Response*. *Journal of bacteriology*. 2013;195(1):66-75.
- 615 21. Raghavan S, Manzanillo P, Chan K, Dovey C, Cox JS. Secreted transcription factor  
616 controls *Mycobacterium tuberculosis* virulence. *Nature*. 2008;454(7205):717-21.
- 617 22. Rickman L, Scott C, Hunt DM, Hutchinson T, Menendez MC, Whalan R, et al. A  
618 member of the cAMP receptor protein family of transcription regulators in *Mycobacterium*  
619 *tuberculosis* is required for virulence in mice and controls transcription of the *rpfA* gene  
620 coding for a resuscitation promoting factor. *Mol Microbiol*. 2005;56(5):1274-86.
- 621 23. Waldbauer JR, Rodrigue S, Coleman ML, Chisholm SW. Transcriptome and proteome  
622 dynamics of a light-dark synchronized bacterial cell cycle. *Plos One*. 2012;7(8):e43432.
- 623 24. Joshi SA, Ball DA, Sun MG, Carlsson F, Watkins BY, Aggarwal N, et al. *EccA1*, a  
624 component of the *Mycobacterium marinum* ESX-1 protein virulence factor secretion pathway,  
625 regulates mycolic acid lipid synthesis. *Chem Biol*. 2012;19(3):372-80.
- 626 25. Weston A, Stern RJ, Lee RE, Nassau PM, Monsey D, Martin SL, et al. Biosynthetic  
627 origin of mycobacterial cell wall galactofuranosyl residues. *Tubercle and lung disease : the*  
628 *official journal of the International Union against Tuberculosis and Lung Disease*.  
629 1997;78(2):123-31.
- 630 26. Pastoret S, Fraipont C, den Blaauwen T, Wolf B, Aarsman ME, Piette A, et al.  
631 Functional analysis of the cell division protein *FtsW* of *Escherichia coli*. *Journal of*  
632 *bacteriology*. 2004;186(24):8370-9.
- 633 27. Schmidt KL, Peterson ND, Kustusich RJ, Wissel MC, Graham B, Phillips GJ, et al. A  
634 predicted ABC transporter, *FtsEX*, is needed for cell division in *Escherichia coli*. *Journal of*  
635 *bacteriology*. 2004;186(3):785-93.

- 636 28. McKinney JD, Honer zu Bentrup K, Munoz-Elias EJ, Miczak A, Chen B, Chan WT, et  
637 al. Persistence of *Mycobacterium tuberculosis* in macrophages and mice requires the  
638 glyoxylate shunt enzyme isocitrate lyase. *Nature*. 2000;406(6797):735-8.
- 639 29. Munoz-Elias EJ, McKinney JD. *Mycobacterium tuberculosis* isocitrate lyases 1 and 2  
640 are jointly required for in vivo growth and virulence. *Nature medicine*. 2005;11(6):638-44.
- 641 30. Liu KY, Yu JZ, Russell DG. *pckA*-deficient *Mycobacterium bovis* BCG shows  
642 attenuated virulence in mice and in macrophages. *Microbiol-Sgm*. 2003;149:1829-35.
- 643 31. Marrero J, Rhee KY, Schnappinger D, Pethe K, Ehrt S. Gluconeogenic carbon flow of  
644 tricarboxylic acid cycle intermediates is critical for *Mycobacterium tuberculosis* to establish  
645 and maintain infection. *Proceedings of the National Academy of Sciences of the United States*  
646 *of America*. 2010;107(21):9819-24.
- 647 32. Kendall SL, Withers M, Soffair CN, Moreland NJ, Gurcha S, Sidders B, et al. A  
648 highly conserved transcriptional repressor controls a large regulon involved in lipid  
649 degradation in *Mycobacterium smegmatis* and *Mycobacterium tuberculosis*. *Mol Microbiol*.  
650 2007;65(3):684-99.
- 651 33. Brodin P, Majlessi L, Marsollier L, de Jonge MI, Bottai D, Demangel C, et al.  
652 Dissection of ESAT-6 system 1 of *Mycobacterium tuberculosis* and impact on  
653 immunogenicity and virulence. *Infection and immunity*. 2006;74(1):88-98.
- 654 34. Daleke MH, van der Woude AD, Parret AHA, Ummels R, de Groot AM, Watson D, et  
655 al. Specific Chaperones for the Type VII Protein Secretion Pathway. *Journal of Biological*  
656 *Chemistry*. 2012;287(38):31939-47.
- 657 35. Sani M, Houben EN, Geurtsen J, Pierson J, de Punder K, van Zon M, et al. Direct  
658 visualization by cryo-EM of the mycobacterial capsular layer: a labile structure containing  
659 ESX-1-secreted proteins. *Plos Pathog*. 2010;6(3):e1000794.
- 660 36. Zheng F, Long Q, Xie J. The function and regulatory network of WhiB and WhiB-like  
661 protein from comparative genomics and systems biology perspectives. *Cell Biochem Biophys*.  
662 2012;63(2):103-8.
- 663 37. Das C, Ghosh TS, Mande SS. Computational analysis of the ESX-1 region of  
664 *Mycobacterium tuberculosis*: insights into the mechanism of type VII secretion system. *Plos*  
665 *One*. 2011;6(11):e27980.
- 666 38. Bosserman RE, Nguyen TT, Sanchez KG, Chirakos AE, Ferrell MJ, Thompson CR, et  
667 al. WhiB6 regulation of ESX-1 gene expression is controlled by a negative feedback loop in  
668 *Mycobacterium marinum*. *Proceedings of the National Academy of Sciences of the United*  
669 *States of America*. 2017;114(50):E10772-E81.
- 670 39. Chen Z, Hu Y, Cumming BM, Lu P, Feng L, Deng J, et al. Mycobacterial WhiB6  
671 Differentially Regulates ESX-1 and the Dos Regulon to Modulate Granuloma Formation and  
672 Virulence in Zebrafish. *Cell Rep*. 2016;16(9):2512-24.
- 673 40. Solans L, Aguilo N, Samper S, Pawlik A, Frigui W, Martin C, et al. A Specific  
674 Polymorphism in *Mycobacterium tuberculosis* H37Rv Causes Differential ESAT-6  
675 Expression and Identifies WhiB6 as a Novel ESX-1 Component. *Infection and immunity*.  
676 2014;82(8):3446-56.
- 677 41. Abdallah AM, Verboom T, Weerdenburg EM, van Pittius NCG, Mahasha PW,  
678 Jimenez C, et al. PPE and PE\_PGRS proteins of *Mycobacterium marinum* are transported via  
679 the type VII secretion system ESX-5. *Mol Microbiol*. 2009;73(3):329-40.
- 680 42. Ates LS, Dippenaar A, Ummels R, Piersma SR, van der Woude AD, van der Kuij K,  
681 et al. Mutations in *ppe38* block PE\_PGRS secretion and increase virulence of *Mycobacterium*  
682 *tuberculosis*. *Nat Microbiol*. 2018;3(2):181-8.
- 683 43. Cao G, Howard ST, Zhang P, Wang X, Chen XL, Samten B, et al. EspR, a regulator of  
684 the ESX-1 secretion system in *Mycobacterium tuberculosis*, is directly regulated by the two-  
685 component systems MprAB and PhoPR. *Microbiology*. 2015;161(Pt 3):477-89.

- 686 44. Hunt DM, Sweeney NP, Mori L, Whalan RH, Comas I, Norman L, et al. Long-range  
687 transcriptional control of an operon necessary for virulence-critical ESX-1 secretion in  
688 *Mycobacterium tuberculosis*. *Journal of bacteriology*. 2012;194(9):2307-20.
- 689 45. den Hengst CD, Buttner MJ. Redox control in actinobacteria. *Bba-Gen Subjects*.  
690 2008;1780(11):1201-16.
- 691 46. Ates LS, van der Woude AD, Bestebroer J, van Stempvoort G, Musters RJ, Garcia-  
692 Vallejo JJ, et al. The ESX-5 System of Pathogenic *Mycobacteria* Is Involved In Capsule  
693 Integrity and Virulence through Its Substrate PPE10. *Plos Pathog*. 2016;12(6):e1005696.
- 694 47. van der Sar AM, Abdallah AM, Sparrius M, Reinders E, Vandenbroucke-Grauls  
695 CMJE, Bitter W. *Mycobacterium marinum* strains can be divided into two distinct types based  
696 on genetic diversity and virulence. *Infection and immunity*. 2004;72(11):6306-12.
- 697 48. Sambandamurthy VK, Derrick SC, Hsu T, Chen B, Larsen MH, Jalapathy KV, et al.  
698 *Mycobacterium tuberculosis* DeltaRD1 DeltapanCD: a safe and limited replicating mutant  
699 strain that protects immunocompetent and immunocompromised mice against experimental  
700 tuberculosis. *Vaccine*. 2006;24(37-39):6309-20.
- 701 49. Sambandamurthy VK, Derrick SC, Jalapathy KV, Chen B, Russell RG, Morris SL, et  
702 al. Long-term protection against tuberculosis following vaccination with a severely attenuated  
703 double lysine and pantothenate auxotroph of *Mycobacterium tuberculosis*. *Infection and  
704 immunity*. 2005;73(2):1196-203.
- 705 50. Levene MJ, Korlach J, Turner SW, Foquet M, Craighead HG, Webb WW. Zero-mode  
706 waveguides for single-molecule analysis at high concentrations. *Science*.  
707 2003;299(5607):682-6.
- 708 51. Chin CS, Alexander DH, Marks P, Klammer AA, Drake J, Heiner C, et al. Nonhybrid,  
709 finished microbial genome assemblies from long-read SMRT sequencing data. *Nature  
710 methods*. 2013;10(6):563-+.
- 711 52. Otto TD, Sanders M, Berriman M, Newbold C. Iterative Correction of Reference  
712 Nucleotides (iCORN) using second generation sequencing technology. *Bioinformatics*.  
713 2010;26(14):1704-7.
- 714 53. Otto TD, Dillon GP, Degraeve WS, Berriman M. RATT: Rapid Annotation Transfer  
715 Tool. *Nucleic Acids Res*. 2011;39(9).
- 716 54. Manganelli R, Dubnau E, Tyagi S, Kramer FR, Smith I. Differential expression of 10  
717 sigma factor genes in *Mycobacterium tuberculosis*. *Mol Microbiol*. 1999;31(2):715-24.
- 718 55. Quinlan AR, Hall IM. BEDTools: a flexible suite of utilities for comparing genomic  
719 features. *Bioinformatics*. 2010;26(6):841-2.
- 720 56. Anders S, Huber W. Differential expression analysis for sequence count data. *Genome  
721 biology*. 2010;11(10).
- 722 57. Carlsson F, Joshi SA, Rangell L, Brown EJ. Polar localization of virulence-related  
723 Esx-1 secretion in mycobacteria. *Plos Pathog*. 2009;5(1):e1000285.
- 724 58. Abdallah AM, Hill-Cawthorne GA, Otto TD, Coll F, Guerra-Assuncao JA, Gao G, et  
725 al. Genomic expression catalogue of a global collection of BCG vaccine strains show  
726 evidence for highly diverged metabolic and cell-wall adaptations. *Sci Rep*. 2015;5:15443.
- 727 59. Zhu J, Zhang HM, Guo TN, Li WY, Li HY, Zhu Y, et al. Quantitative proteomics  
728 reveals differential biological processes in healthy neonatal cord neutrophils and adult  
729 neutrophils. *Proteomics*. 2014;14(13-14):1688-97.
- 730 60. Shadforth IP, Dunkley TPJ, Lilley KS, Bessant C. i-Tracker: For quantitative  
731 proteomics using iTRAQ (TM). *BMC genomics*. 2005;6.
- 732 61. Mohn WW, van der Geize R, Stewart GR, Okamoto S, Liu J, Dijkhuizen L, et al. The  
733 actinobacterial *mce4* locus encodes a steroid transporter. *The Journal of biological chemistry*.  
734 2008;283(51):35368-74.
- 735

736

737 **Figure legends**

738

739 Figure 1: Global features of the *M. marinum* & *M. tuberculosis* *esx-1* mutant transcriptome

740 and proteome

741 Volcano plots obtained from RNA-Seq analysis of wild-type *M. marinum* E11 strain vs. the

742 *eccCb<sub>1</sub>* transposon mutant (A) and *M. tuberculosis* mc<sup>2</sup>6020 vs. the ESX-1 mutant strain (B).

743 Red dots indicate statistical significance ( $q < 0.05$ ) and black dots indicate a lack of statistical

744 significance. Selected genes that are most down or up-regulated in the *ESX-1* mutant strains

745 are highlighted. (C) Venn diagram of the number of differentially expressed transcripts and

746 proteins quantified using RNA-seq and quantitative proteomics respectively. Scatterplots of

747 the relationship between differentially expressed genes of *M. marinum* *eccCb<sub>1</sub>* transposon

748 mutant compared to its isogenic wild-type strain E11, quantified in both data sets and

749 classified by (D) lipid metabolism, (E) regulatory proteins and (F) cell wall and cell processes

750 categories. Scatterplots and bar chart display the rectilinear equation and coefficient of

751 determination ( $R^2$ ).

752

753 Figure 2: Most differentially expressed genes of *M. marinum* and *M. tuberculosis*, when

754 grown in culture medium, grouped into broad functional categories. Within each group, genes

755 are ranked in ascending order by  $p$ -value. (Red) Top-100 annotated *M. marinum* E11 genes

756 that show the most differentially expressed in *M. marinum* *eccCb<sub>1</sub>* transposon mutant

757 compared to its isogenic wild-type strain E11 during growth in 7H9 culture medium. Bar

758 chart of log<sub>2</sub> fold change for individual genes (RNA, blue; protein, red; locus tags, outer).

759 (Green) Top-100 annotated *M. tuberculosis* genes that show the most differentially expressed

760 in auxotrophic *M. tuberculosis* RD1 deletion mutant strain mc<sup>2</sup>6030 compared to its isogenic

761 control strain mc<sup>2</sup>6020 during growth in 7H9 culture medium. Bar chart of log<sub>2</sub> fold change

762 for individual genes. The genes Rv3872-Rv3878 are not included as these genes are deleted in  
763 the RD1 mutant strain.

764

765 Figure 3. Effect of ESX-1 disruption (*eccCb<sub>1</sub>* transposon mutant) on gene transcription during  
766 infection (indicated as int') and growth in culture medium in *M. marinum* compared to wild-  
767 type strain E11 during growth in 7H9 culture medium. (A) Relative transcript expression  
768 levels of ESX-1 secretion system-associated genes including the main ESX-1 locus as well as  
769 the EspR regulator and accessory factors EspA operon encoded outside the RD-1 region. (B)  
770 Gene expression levels, as measured by q-RT-PCR, Gene expression levels were compared to  
771 those of the wild-type strain E11 grown in similar conditions. Values represent mean  $\pm$   
772 standard error of two biological replicates. (C, D) Regulation of cell wall synthesis including  
773 genes involved in mycolic acid synthesis (C) and phthiocerol dimycocerosates (PDIM) (D).

774

775 Figure 4. *esx-1* transposon mutants have similar gene transcription profiles. Gene expression  
776 levels for *M. marinum* *eccB<sub>1</sub>*, *eccCa<sub>1</sub>*, *eccCb<sub>1</sub>*, *eccD<sub>1</sub>* and *eccE<sub>1</sub>* transposon mutants as  
777 measured by q-RT-PCR. All strains were grown in 7H9 culture medium and gene expression  
778 levels were compared to those of the wild-type strain E11. Values represent mean  $\pm$  standard  
779 error of at least three biological replicates.

780

781 Figure 5. Regulation of ESX-1 secretion system. (A) Down-regulation of *espL* is the result of  
782 a regulatory process. A functional copy of *espL* was introduced in *M. marinum* wild type and  
783 *eccCb<sub>1</sub>* mutant strains and *espK* and *espL* gene expression levels were measured by qRT-  
784 PCR. Gene expression levels were compared to those of the wild type strain E11. Values  
785 represent mean  $\pm$  standard error of two biological replicates. (B) Introduction of  
786 PE35/PPE68\_1 results in increased EsxA secretion but not in gene regulation. Pellet (p), cell

787 wall extract (cw) and supernatant (s) fractions of *M. marinum* wild type and *eccCb1* mutant  
788 strains expressing PE35/PPE68\_1, PE35/PPE68 containing a C-terminal deletion of PPE68\_1,  
789 or PE35/PPE68\_1 containing a 15-amino acid C-terminal deletion of PE35, were analyzed for  
790 the presence of EspE, EsxA and the introduced PE35 by Western blot. Fractions represent 0.5,  
791 1 or 2 OD units of original culture, respectively. In all cases, PE35 contained a C-terminal  
792 HA-tag. (C) EspG1, EspI and PE35/PPE68\_1 do not regulate transcription of selected *esx*-1  
793 (associated) genes. EspG1, EspI or PE35/PPE68\_1 were overexpressed in the *M. marinum*  
794 *eccCb1* mutant strain and expression levels of *espK*, *espL*, *esxA*, *pe\_pgrs1* and *eccDI* were  
795 measured by q-RT-PCR. Gene expression levels were compared to those of the wild-type  
796 strain E11. Values represent mean  $\pm$  standard error of at least two biological replicates. (D)  
797 WhiB6 is involved in transcriptional regulation of ESX-1 substrates and associated genes. The  
798 *whib6* gene was overexpressed in the *M. marinum eccCb1* mutant strain and transcript levels  
799 of *espK*, *espL*, *esxA*, *pe\_pgrs1* and *eccDI* were measured by q-RT-PCR. Gene expression  
800 levels were compared to those of the *eccCb1* mutant strain. Values represent mean  $\pm$  standard  
801 error of two biological replicates.

802

803 Figure 6. Expression profile of the complementary strains (*M. marinum*  $M^{USA}$  –  
804 Complementary and *M. marinum*  $M^{VU}$  –Complementary) and knock-out strains (*M. marinum*  
805  $M^{USA}$  – $\Delta whiB6$ –and *M. marinum*  $M^{VU}$  – $\Delta whiB6$ ) compared with the corresponding control  
806 strains (*M. marinum*  $M^{USA}$  –Empty Vector strain and *M. marinum*  $M^{VU}$  –Empty Vector). The  
807 *whiB6*-activated gene set expression heat map is shown in (A), the ESX-1 locus expression is  
808 shown in (B) and (C) shows the *whiB6*-repressed gene set.

809

810 **Supplementary table and figure legends**

811

812 **Table S1.**

813 Complete list of genes that are significantly changed in the *M. marinum eccCb<sub>1</sub>* transposon  
814 mutant compared to its isogenic wild-type strain E11 during growth in 7H9 culture medium.

815 P<0.05.

816

817 **Table S2.**

818 Complete list of proteins of which expression is changed in *M. marinum eccCb<sub>1</sub>* transposon  
819 mutant compared to its isogenic wild-type strain E11 during growth in 7H9 culture medium.

820 Protein with greater than 2-fold change was considered as significantly differentially  
821 expression

822

823 **Table S3.**

824 Complete list of genes that are significantly changed in the auxotrophic *M. tuberculosis* RD1  
825 deletion mutant strain mc<sup>2</sup>6030 compared to its isogenic control strain mc<sup>2</sup>6020 during  
826 growth in 7H9 culture medium. P<0.05.

827

828 **Table S4.**

829 Complete list of genes that are significantly changed in the *M. marinum eccCb<sub>1</sub>* transposon  
830 mutant compared to the wild-type strain E11 during infection of human THP-1 macrophages.

831 P<0.05.

832

833 **Table S5.**

834 Complete list of genes that are significantly changed in the *M. marinum* wild-type strain  
835 during infection of macrophages compared to growth in 7H9 culture medium. P<0.05.

836

837 **Table S6.**

838 Complete list of genes that are significantly changed in the *M. marinum eccCb<sub>1</sub>* transposon  
839 mutant strain during infection of macrophages compared to the wild-type strain E11 during  
840 growth in 7H9 culture medium. P<0.05.

841

842 **Table S7.**

843 Complete list of genes that are significantly changed in the *M. marinum eccCb<sub>1</sub>* transposon  
844 mutant strain during infection of macrophages compared to growth in 7H9 culture medium.  
845 P<0.05.

846

847 **Table S8.**

848 Primers used in this study. Restriction sites showed in bold.

849

850 **Figure S1**

851 Euclidean distance matrices of RNA-seq transcriptome data showing clustering of *M.*  
852 *marinum* wild-type (E11) and *eccCb<sub>1</sub>* transposon mutant samples (ESX-1) grown in culture  
853 medium (three biological replicates) or during infection of THP-1 cells (indicated as ‘int’).

854

855 **Figure S2**

856 Principal component cluster analysis (PCA) of biological replicates of proteome data showing  
857 clustering of *M. marinum* wild type (E11) and *eccCb<sub>1</sub>* transposon mutant samples (ESX-1).  
858 PCA mapping showed clustering of biological replicates from E11 wild type and *esx-1*  
859 mutant.

860

861 **Figure S3**



862 Correlation between protein and mRNA expression of *M. marinum eccCb<sub>1</sub>* transposon mutant  
863 compared to its isogenic wild-type strain E11 during growth in 7H9 culture medium. (A)  
864 Scatterplot of the relationship between differentially expressed genes quantified in both data  
865 sets. (B-F) Scatterplots for protein and transcript gene expression classified by functional  
866 categories. Scatterplots display the rectilinear equation and coefficient of determination ( $R^2$ ).  
867

#### 868 **Figure S4**

869 Functional categories classification of genes that are significantly changed in the  
870 transcriptome and proteome of the *M. marinum eccCb<sub>1</sub>* transposon mutant compared to its  
871 isogenic wild-type strain E11 during growth in 7H9 culture medium. Genes exhibiting  
872 differential expression at the RNA and protein level were grouped according to the Marinolist  
873 classification (<http://mycobrowser.epfl.ch/marinolist.html>).  
874

#### 875 **Figure S5**

876 Most differentially expressed genes of *M. marinum eccCb<sub>1</sub>* transposon mutant compared to its  
877 isogenic wild-type strain E11 during infection of primary macrophages, grouped into broad  
878 functional categories. Within each group, genes are ranked in ascending order by *P*-value.  
879 (A). Top-100 annotated *M. marinum E11* strain genes that show the most differentially  
880 expressed in *M. marinum* wild-type strain E11 during infection of primary macrophages. Bar  
881 chart of log<sub>2</sub> fold change for individual genes (tags, left). (B). Top-100 annotated *M. marinum*  
882 *E11* strain genes that show the most differentially expressed in *M. marinum eccCb<sub>1</sub>*  
883 transposon mutant compared to its isogenic wild-type strain E11 during infection of primary  
884 macrophages (tags, left). Bar chart of log<sub>2</sub> fold change for individual genes.

885

#### 886 **Figure S6:**

887 Regulation of genes encoding proteins predicted to be involved in metabolic adaptation,  
888 energy metabolism and transcriptional regulatory in *M. marinum eccCb<sub>1</sub>* transposon mutant  
889 grown in 7H9 culture medium as well as wild type and *eccCb<sub>1</sub>* transposon mutant during  
890 infection in human THP-1 macrophages (indicated as 'int') compared to wild-type strain E11  
891 during growth in 7H9 culture medium. (A) *Catabolism of Fatty Acid*. Genes were selected  
892 based on their annotation and ordered based on expression. (B) Energy generation and NAD<sup>+</sup>  
893 regeneration. Genes were selected based on their annotation and ordered based on expression.  
894 (C) Genes of the *kstR* regulon which are required for uptake and metabolism of cholesterol  
895 (32, 61). (D) Transcriptional regulatory. Genes were selected based on their annotation and  
896 ordered based on expression.

897 **Figure S7**

898 The enriched Gene ontology (GO) Terms of the Activation (Exclude ESX-1 locus genes) gene  
899 set and Repression gene set. The molecular function GO terms are in red color while the  
900 biological processes are in blue color.

901

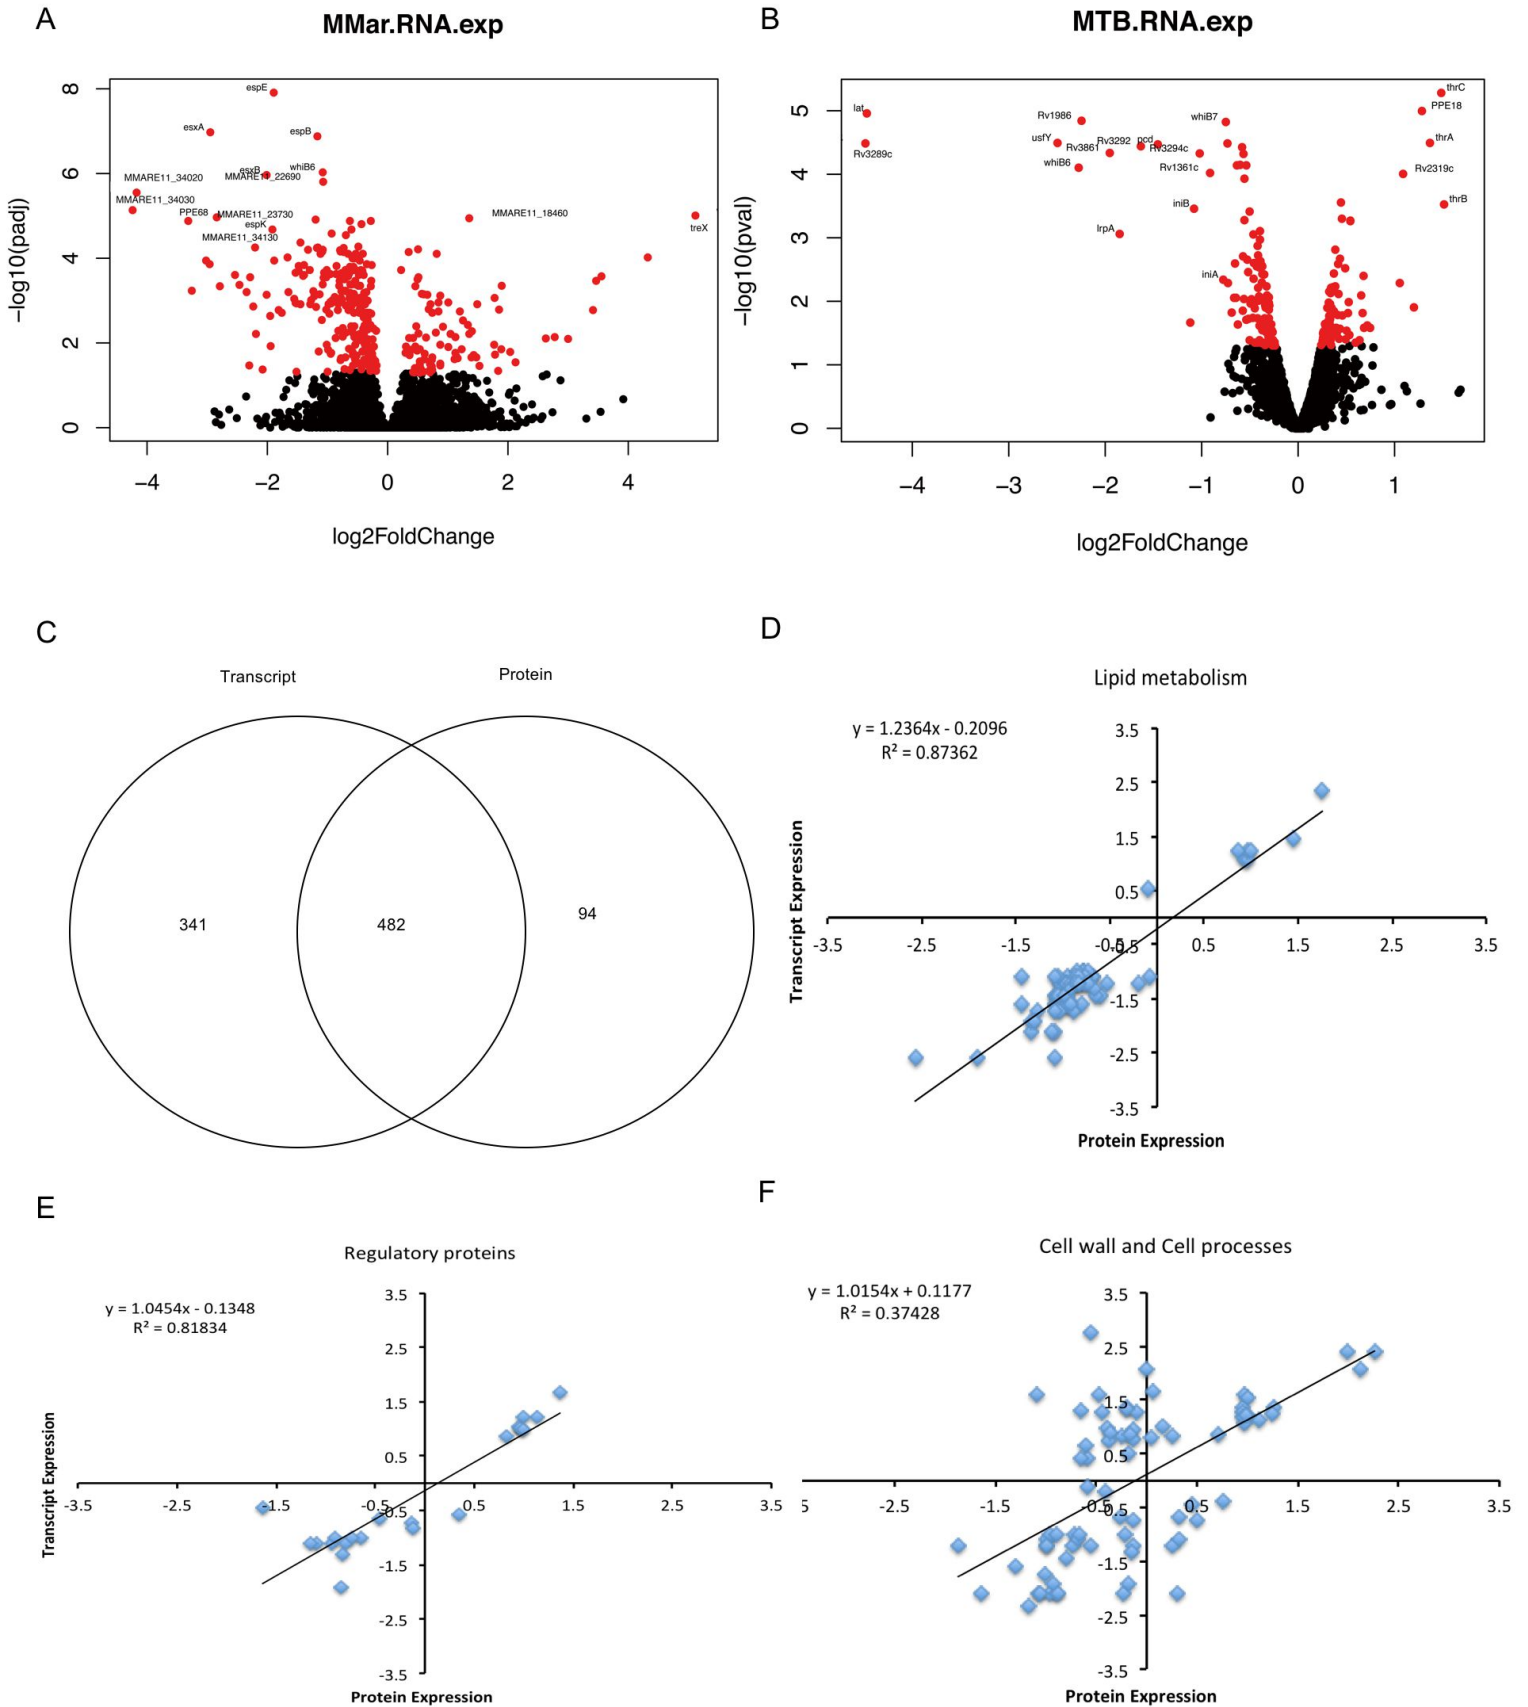

Figure.1



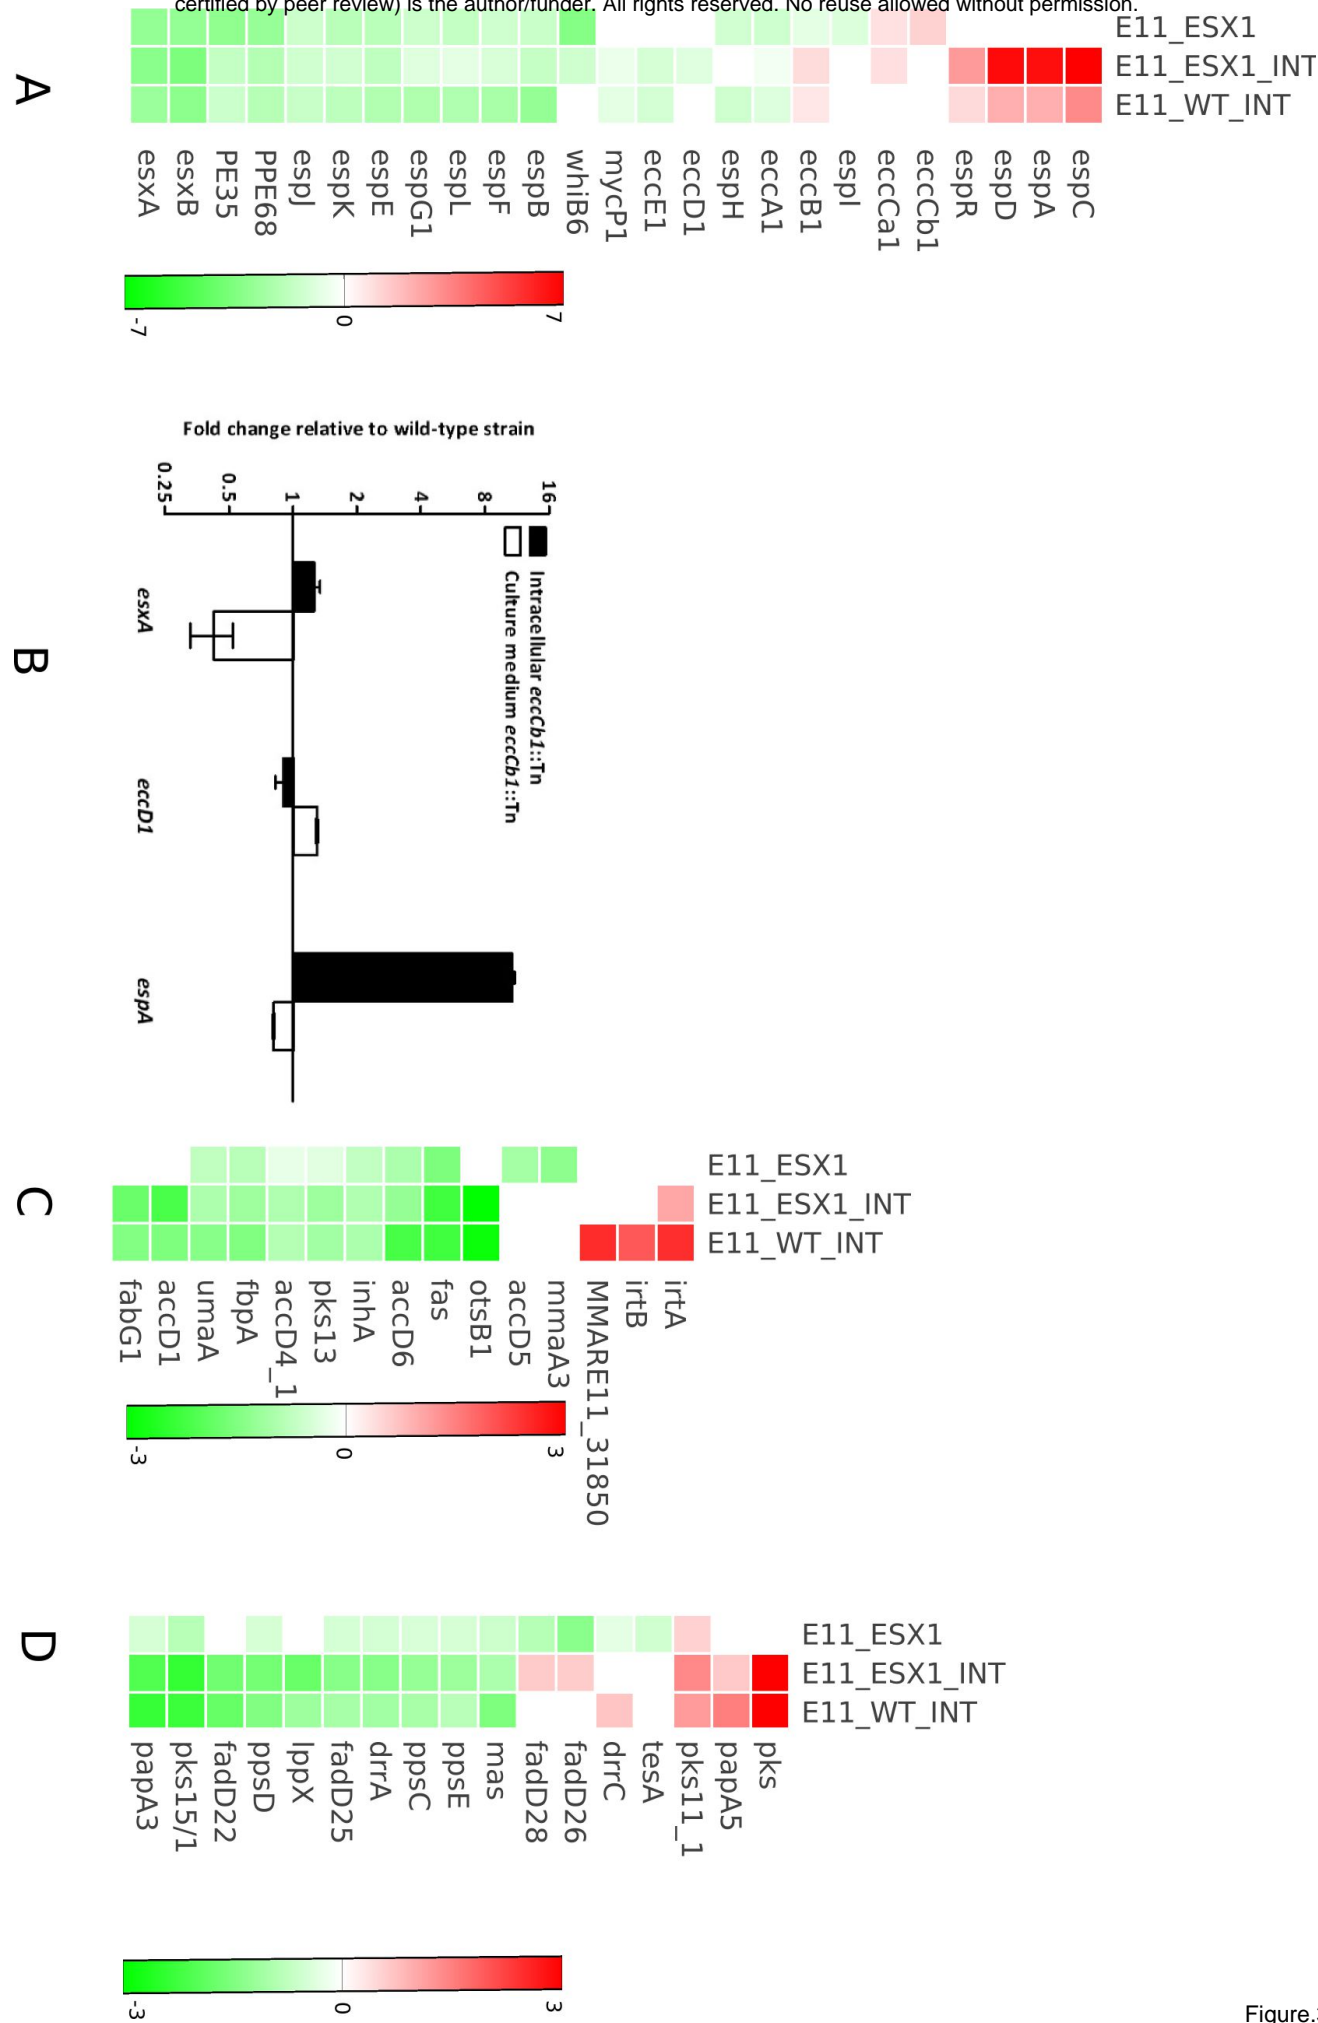

Figure.3

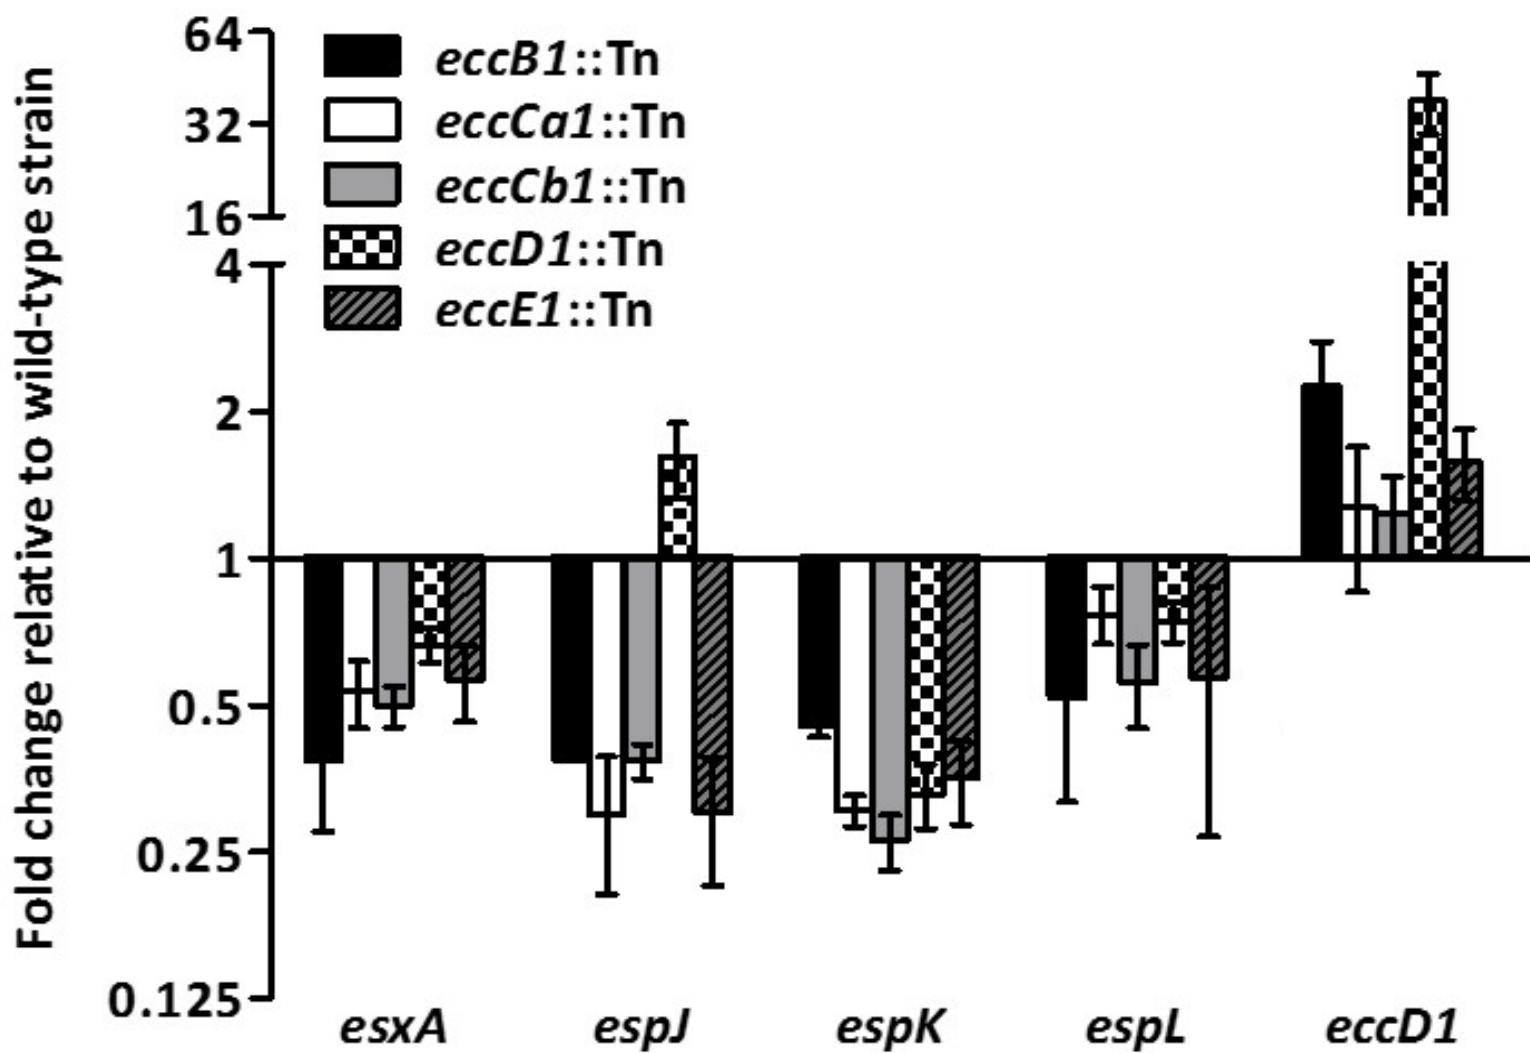

Figure.4

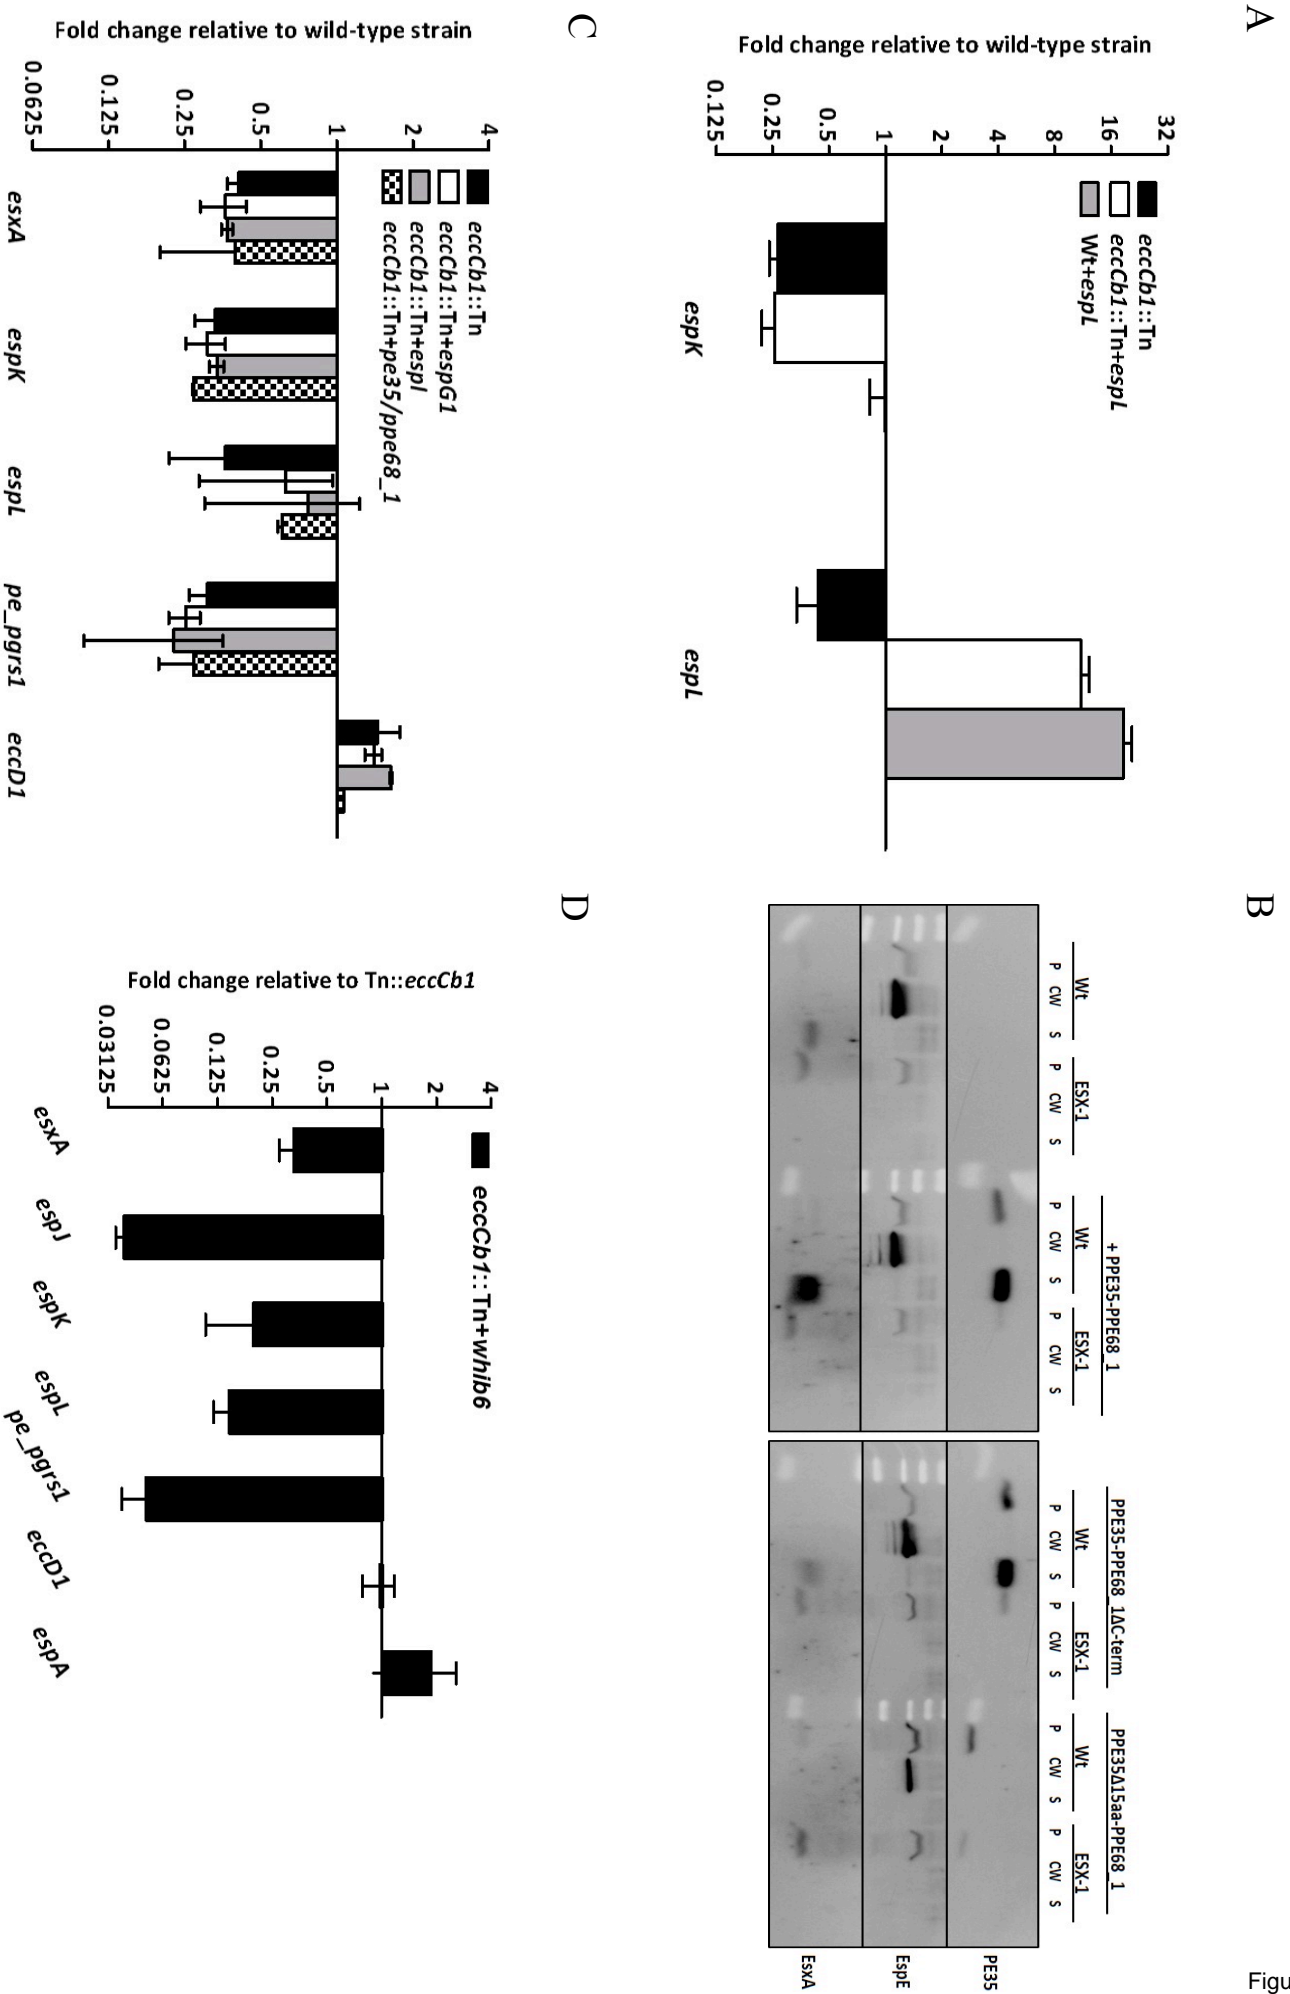

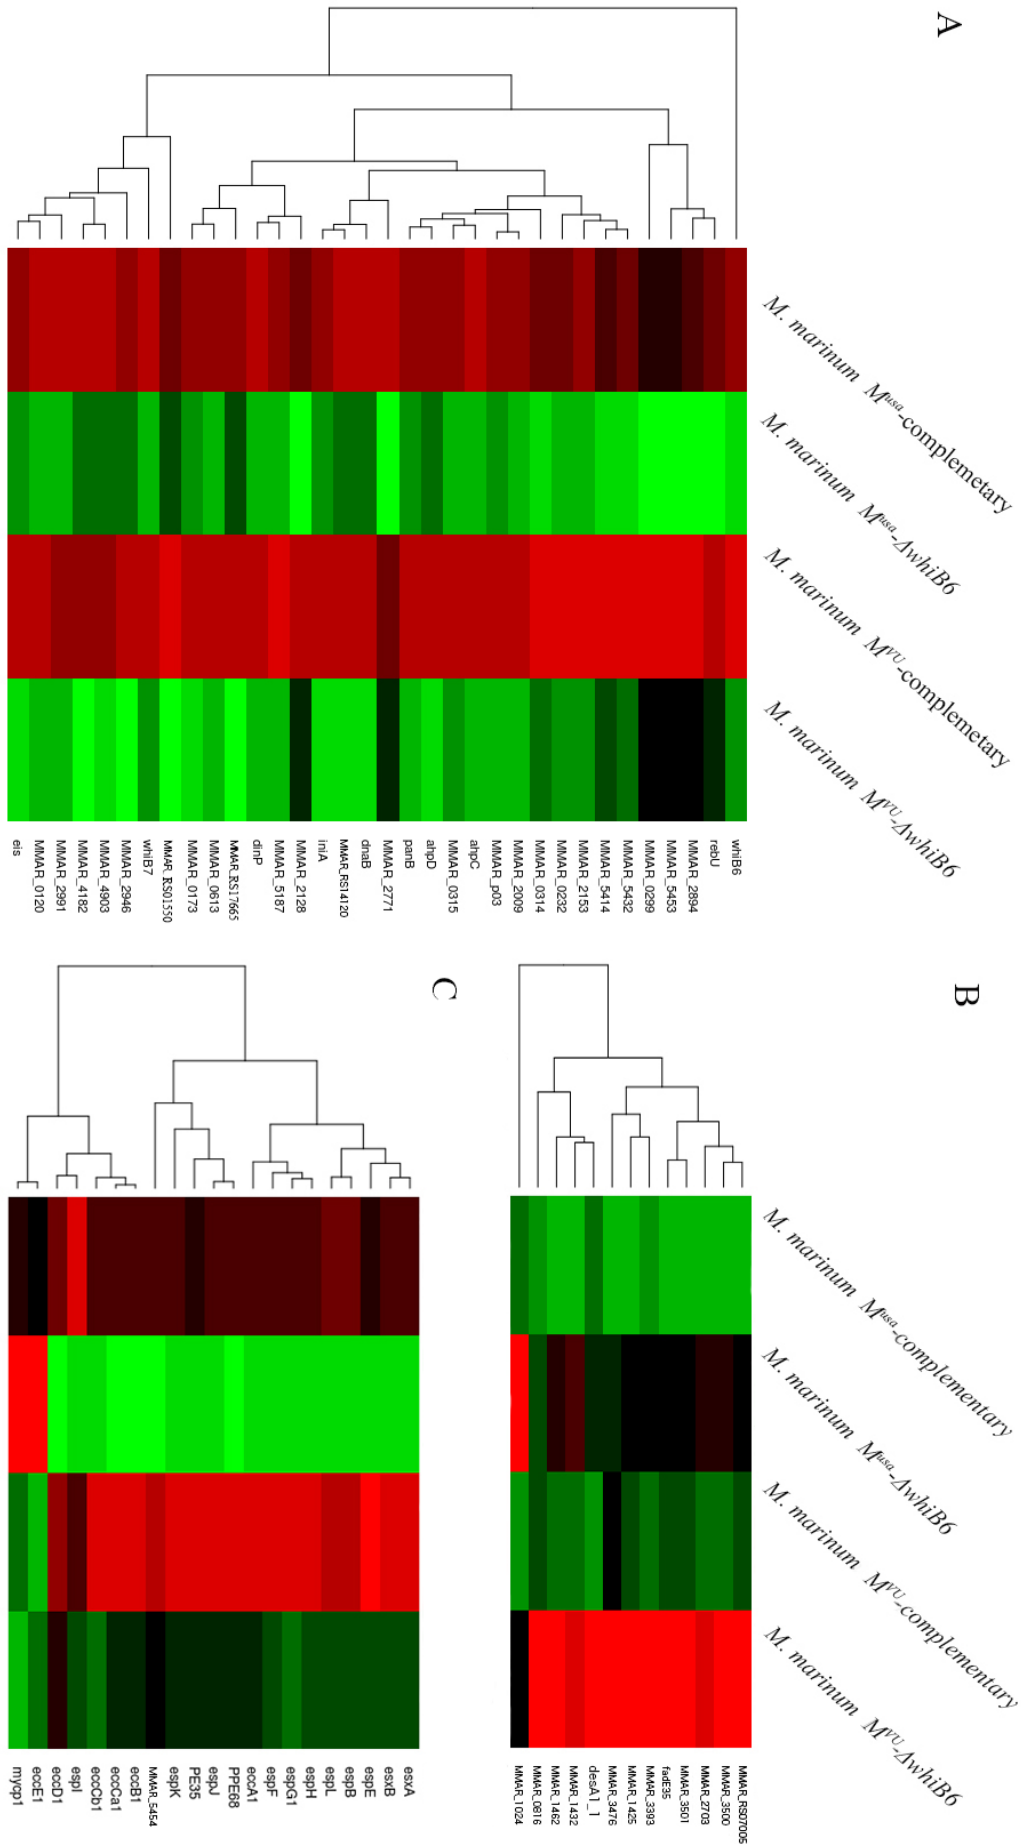

Figure.6
